**Allometric scaling impacts plasticity in biomass allocation, morphology and anatomical traits due to above and belowground resource limitation in cultivated sunflower (*Helianthus annuus* L.)**

Yan Wang<sup>1,2</sup>, Lisa A. Donovan<sup>1</sup>, Andries A. Temme<sup>1\*</sup>

1. Department of Plant Biology, Franklin College of Arts and Sciences, The University of Georgia, Athens, GA, USA

2. Department of Silviculture, School of Forestry, Northeast Forestry University, Harbin, Heilongjiang, 150040, China

\*Corresponding author: [atemme@uga.edu](mailto:atemme@uga.edu) (+1 706 207 4020)

# Abstract

- Under benign conditions, as plants grow, size dependent (allometric) scaling changes mass allocation between organs. In the face of resource stress plants grow less but also show plasticity in multiple trait categories, including biomass allocation, morphology and anatomy. The extent to which size dependent (allometric) vs active (beyond allometric) responses to resource limitations are consistent with expectations for increasing resource acquisition potential is poorly understood. Here we assess the impact of allometric scaling on the direction, magnitude and coordination of trait plasticity in response to light and/or nutrient limitations in cultivated sunflower (*Helianthus annuus*).
- We grew seedlings of ten sunflower genotypes for three weeks in a factorial of light (50% shade) and nutrient (10% supply) limitation in the greenhouse and measured a suite of allocational, morphological and anatomical traits for leaves, stems, fine roots, and tap roots.
- Under resource limitation, more biomass was allocated to the organ capturing the most limiting resource, as expected. Allometric scaling accounted for a substantial portion of many trait responses, especially for anatomical traits. Allometric and active responses were generally aligned in the same direction and for specific leaf area and specific root length under light and nutrient limitation, respectively, this alignment contributed to more acquisitive trait values. However, traits not generally associated with resource limitation showed the greatest active adjustment, e.g. tap root and stem theoretical hydraulic conductance. Although light limitation triggered a more pronounced coordinated trait adjustment than nutrient limitation, factoring out allometric scaling clarified that active coordinated trait responses to both light and nutrient limitation were similar in scale but resource specific.
- The substantial contribution of allometric scaling to trait responses that are consistent with a functional increase in the uptake capacity of the most limiting resource suggests that both allometric and active trait adjustments need be considered as potentially adaptive.
- **Keywords:** allocation, morphology, anatomy, allometry, phenotypic plasticity, K<sub>s</sub>, SLA, SRL

## Introduction

The extent of plant trait adjustment in response to a changed environment is generally considered as the plant's phenotypic plasticity (Nicotra *et al.*, 2010; Valladares *et al.*, 2007). According to theory (Gedroc *et al.*, 1996; Shipley & Meziane 2002; Poorter *et al.*, 2012; Robinson *et al.*, 2010), this plasticity serves to optimize/maximize the uptake of the most limiting resource (Bloom *et al.*, 1985; Chapin, 1991). For example, increased mass allocation to leaves under shade, or to roots under nutrient limitation alleviates some of the stress caused by resource limitation (Shipley & Maziane, 2002; Sugiura & Tatenno, 2011). However, since plants are inevitably smaller under resource stress, a factor to consider in understanding these traits shifts under resource limitation is how allometric scaling affects traits (McConnaughay & Coleman 1999; Onsas *et al.*, 2013; Poorter *et al.* 2015; Reich 2002, 2018; Shipley & Meziane, 2002; Weiner 2004;).

Allometric scaling, as narrowly defined, governs the relationship between mass allocation at differing plant parts (Weiner 2004). Across and within species this scaling relationship is such that smaller plants allocate proportionally more mass to leaves than to roots (Poorter *et al.*, 2015). Thus, in shade, allometric scaling associated with a smaller plant under limiting resources could be seen as a strategy to acquire the most limiting resource at a given plant size (Coleman *et al.*, 1994; Müller *et al.*, 2000; Reich, 2002). This "passive" (Nicotra *et al.*, 2010) or "apparent" (McConnaughay and Coleman 1999) plasticity predisposes the plant to attune its traits with the available resources and resource demand. However, there is evidence for active adjustments (adjustments beyond those accounted for by allometry) that can affect resource uptake. For example, greater plant height for a given mass under low light condition aids in light uptake (Rice & Bazzaz, 1989). The extent to which plasticity in a broader range of trait responses (beyond just mass allocation) during resource limitation is active vs an effect of size dependent (allometric) scaling is poorly understood.

Most research to date governing allometric scaling has focused on broad intraspecific comparisons of species (Poorter *et al.* 2015). However, at the intraspecific level there could be population or genotypic level differences in these scaling relationships. If responses due to allometric scaling and active adjustments vary in the degree to which they align, and if this variation has a genetic component, then within species and populations there could be variation in tolerating stress at different points in the growth cycle. Moreover, "passive" adjustments in traits associated with size cannot be a priori regarded as or ruled out as adaptive (cf Nicotra *et al.* 2010, Poorter *et al.* 2019). If traits responses that are consistent with greater ability to take up the most limiting resource have both allometric and active components, this suggests that the magnitude and alignment of both components need to be considered when evaluating evidence for functional and putatively adaptive responses.

Among plant traits, anatomical traits are often overlooked due to time and budget constraints. However, variation in anatomical traits underlies or contributes to variation in morphological and physiological traits that have received much attention (John *et al.*, 2017; Kong *et al.*, 2014; Scoffoni *et al.*, 2015). For example, palisade parenchyma thickness is positively correlated to leaf thickness (Catoni *et al.*, 2015) and photosynthetic rate (Chatelet *et al.*, 2013). A thicker cortex could provide a relative larger site for mycorrhizal infection and higher resource uptake in thicker roots, especially for the arbuscular mycorrhiza (Kong *et al.*, 2014). Root cortex thickness, due to the size of cortical cells (Eissenstat & Achor, 1999) strongly affects fine root diameter (Gu *et al.*, 2014; Guo *et al.*, 2008). Exploring how responses in anatomical traits align with those of other traits will enhance our understanding of how plants adjust to changing environmental conditions from tissue, to organ, to architecture.

Across species or populations within a species, plant functional traits are generally expected to exhibit a coordinated shift due to resource limitation in their typical habitats, i.e., the leaf, stem, root and whole-plant economics spectrum with acquisitive traits at high resource conditions (Díaz *et al.*, 2016; Fortunel *et al.*, 2012; Reich, 2014; Wright *et al.*, 2004;). Moreover, trait values are thought to show a coordinated response across all organs, supporting the idea of a whole-plant-based strategy (Reich, 2014). However, within species, much remains unclear about how the expectation of integrated trait responses at the ‘whole plant economic spectrum’ (Reich, 2014) level plays out at the level of environmentally induced plasticity. Especially in terms of coordination among a broad set of traits and plant organs and how size induced, allometric, plasticity affects this.

To add to our understanding of plant response to resource limitation, here we examined trait responses to light and nutrient limitation of traits across different trait categories (biomass allocation, morphology and anatomy) and organs (leaf, stem and root) in cultivated sunflower. Prior research has shown strong plastic responses to resource limitation and other environmental factors in *Helianthus* (Bowsher *et al.*, 2017; Donovan *et al.*, 2014; Masalia *et al.* 2018; Temme *et al.*, 2019). Specifically, we sought to answer the following questions:

- 1) How do mass allocation, organ morphology, and anatomy change with above and below ground resource limitation, and what role does size scaling of traits play in this?
- 2) How do traits compare for magnitude of plasticity and what role does size scaling of traits play in this?
- 3) Do traits show a coordinated shift due to resource limitation across all organs and what role does size scaling of traits play in this?

## Material and Methods

### *Experimental design*

To address these questions we selected a set of 10 cultivated sunflower genotypes, varying broadly in biomass based on prior work (**Table S1**) from a larger diversity panel used for genomic dissection of traits (Mandel *et al.*, 2011; Masalia *et al.*, 2018; Nambesee *et al.*, 2015). We conducted a factorial design of two nutrient treatments (rich and poor) and two light treatments (sun and shade) at the Botany greenhouses of The University of Georgia USA in March 2018. Achenes were sown in seedling trays and allowed to grow for seven days, after which each seedling was transplanted to 5 liter (1.3 gallon) pot filled with a 3:1 sand:calcinated clay mixture (Turface MVP, Turface Athletics, Buffalo Grove, IL). Pots were arranged in a split plot design of 6 replicate blocks or whole-plot. The light treatment was applied as the whole-plot factor, with 2 sub-plots in each plot randomly assigned to unshaded or 50% shade generated with high density woven polyethylene cloth (Fig. S1). Within each subplot, two pots of each genotype were randomly distributed and supplied with either 40g or 4g fertilizer (Osmocote Plus 15-9-12 with micronutrients, Scotts, Marysville, OH, USA), totaling 240 pots (plants). Greenhouse temperature controls were set to maintain 18–24 °C, and supplemental lighting was provided to maintain a 15/9-h photoperiod.

### *Plant harvest and trait measurements*

Plants were harvested 3 weeks after transplanting (4 weeks after germination). At harvest, plant height (from soil surface to top of apical meristem) and stem diameter (midway between cotyledons and first leaf pair) were measured. Plants were separated into root, leaf (including cotyledons), and stem (including bud if present—rarely) for organ anatomy, morphology and allocation measurements. In order to determine the relative magnitude of adjustments to anatomy, morphology and allocation traits we assigned all measured traits to one of these three categories. While we believe our assignment of traits to categories is defensible, we acknowledge that this is

somewhat arbitrary and that different groupings could influence results associated with comparisons among categories.

For plant anatomical traits, from each replicate plant, one recently matured fully expanded leaf was sampled, cutting a 1×0.5 cm rectangle out of the leaf center, a 5 mm length stem segment (centered between the cotyledon and the first leaf pair) was cut, a 1 cm tap root segment was cut 4 cm below the root/stem junction, and from a single lateral root attached to the tap root near to the root/stem junction with an intact root tip, a 1 cm fine root segment was cut 2 cm from the apex of the root. All tissue subsamples were fixed in formalin–acetic acid–alcohol solution, FAA, (50% ethanol (95%), 5% glacial acetic acid, 10% formaldehyde (37%) and 35% distilled water).

Fixed subsamples were processed for anatomy at the University of Georgia Veterinary Histology Laboratory. Each sample was embedded and gradually infiltrated with paraffin, sliced with a sledge microtome, mounted to a slide, and stained with safranin and fast green dye. Slides were imaged with a camera mounted Zeiss light microscope using ZEN software (Carl Zeiss Microscopy, Oberkochen, Germany). Cell (i.e., conduit) and tissue (i.e., palisade and spongy, cortex and vascular or stele) dimensions of leaf, stem, fine and tap roots were traced using Motic Images Advanced 3.2 software (Motic Corporation, Xiamen, China). Theoretical hydraulic conductivity ( $K_s$ ,  $\text{kg}\cdot\text{s}^{-1}\cdot\text{m}^{-1}\cdot\text{MPa}^{-1}$ ) for each sample was calculated, based on the Hagen-Poiseuille equation (Tyree & Ewers, 1991):  $k_s = (\pi\rho/128\eta A_w) \sum_{i=1}^n d_i^4$ . where  $\rho$  is the density of water ( $988.3 \text{ kg}\cdot\text{m}^{-3}$  at  $20^\circ\text{C}$ );  $\eta$  is the viscosity of water ( $1.002\times 10^{-9} \text{ MPa}\cdot\text{s}$  at  $20^\circ\text{C}$ );  $A_w$  is the stele (vascular) cross-section area,  $d$  is the diameter of the  $i^{\text{th}}$  vessel and  $n$  is the number of conduits in the xylem.

For plant morphological traits, after anatomical trait samples were collected, the rest of the leaf, stem, and fine/tap root of each plant were scanned (Espon, Expression1680, Japan). Total root length and volume of fine root, tap root and stem, as well as leaf area were measured using WinRhizo (v. 2002c, Regent Instruments, Quebec, Canada), respectively. Then, the subsamples were dried at  $60^\circ\text{C}$  for 48 h and weighed. Specific leaf area (SLA,  $\text{cm}^2\cdot\text{g}^{-1}$ ) and specific root length (SRL,  $\text{m}\cdot\text{g}^{-1}$ ) were calculated as the ratios of leaf area to leaf dry mass, and root length to root dry mass, respectively. Tissue density ( $\text{g}\cdot\text{cm}^{-3}$ ) was calculated as the ratio of dry mass to volume for stem, tap and fine root, respectively. Leaf dry matter content (LDMC,  $\text{mg}\cdot\text{g}^{-1}$ ), used as a proxy for leaf tissue density, was measured as leaf dry mass divided by leaf fresh mass (Kramer-Walter *et al.*, 2016; Wilson *et al.*, 1999).

For allocational traits, total plant dry mass was calculated as the sum of all plant parts, including the subsamples for anatomical and morphological traits. Once anatomy and morphology subsamples were collected, the remaining tissue organs were dried at  $60^\circ\text{C}$  for 48 h and weighed. Prior to fixed in FAA, the fresh biomass of subsamples for anatomical analysis was measured and converted to dry biomass based on the ratio of fresh/dry biomass of remaining tissue organs. Finally, the mass fractions for each tissue were calculated as proportions of total plant dry mass ( $\text{g}\cdot\text{g}^{-1}$ ).

### Data analysis

The statistical analysis for the phenotypic data was performed using R v3.5.1 (R Core Team). To obtain genotype means from our split plot design, a mixed effects model was fitted using the package *lme4* (Bates *et al.*, 2018) with genotype, light and nutrient level and all their interactions as fixed effects and light treatment within block as random factor. Least-square (LS) means of all trait values without random factor were estimated from this model using the R package *emmeans* (Lenth *et al.*, 2018). To test the effect of genotype and treatment on measured traits we fitted a less expansive mixed effects model with genotype, light and nutrient level as well as the interaction between light and nutrient level as fixed effects (following Freschet *et al.*, 2018) and light treatment

within block as random factor. From this model, fixed effects were then tested using a Walds Chi-square test in a type III Anova using the package *car* (Fox *et al.*, 2018). Differences between treatments were tested using a Tukey test corrected for multiple comparisons. We then estimated the influence of plant allometry on the significance of nutrient and light limitation effects on traits by adding (log-transformed) plant biomass as a fixed factor to both models and recalculating means and significance (Ryser & Eek, 2000; Wahl *et al.*, 2001). The relative shift in trait value per genotype was calculated as the value in control (high nutrient & unshaded conditions) minus that in each treatment, and divided by the value at control.

To quantify the plastic response of each trait to each resource limitation treatment, we calculated the relative distance plasticity index (RDPI, Valladares *et al.*, 2006, Scoffoni *et al.*, 2015) as  $(x'_i - x_i/x'_i + x_i)$ , where  $x_i$  and  $x'_i$  are the mean trait values of genotypes grown under control (high-light and high-nutrient) and resource limited condition. In addition, the RDPI for each traits and resource limitation treatment was recalculated after correcting for plant size (total biomass). Significant values of RDPI (difference from zero, no plasticity) were determined using T-test on genotype averages.

A principal component analysis (PCA) was applied to the trait data before and after correcting for size, to determine major sources of variation across multiple traits and identify whether there were concerted trait adjustments to limitation in above or belowground resources. Differences between treatments were tested using, Bonferroni corrected, Hotellings-t test on the first two principal components. Data visualizations were made using *ggplot2* (Wickham *et al.*, 2018).

## Results

Across all genotypes, plant biomass decreased by 21.4%, 53.3%, and 65.8% under light, nutrient, and combined limitation, respectively, with additive effects of both stresses on whole plant biomass (**Fig. 1a, Table 1**). Moreover, traits frequently scaled with biomass and genotypes differed in the effect of biomass on trait value (**Table 1**).

### *Allometric and active responses to resource limitation*

Allocational traits were affected in contrasting ways by above and belowground resource limitation. The ratio of leaf mass to fine root mass (LFRratio) increased under light limitation (+82.6%) due to both increased mass allocation to leaf mass (LMF, +3.7%) and decreased allocation to fine roots mass (FineRMF, -41.4%). In contrast, LFRratio decreased under nutrient limitation (-45.7%) due to decreased LMF (-12.1%) and an increased FineRMF (+71.4%). A significant interaction of light and nutrient limitation was found on allocational traits, e.g., LMF, stem mass fraction (SMF) and FineRMF (**Table 1**). After allometric scaling was taken into account by statistically correcting for the effect of total plant dry mass on trait values, the effect of light limitation on leaf mass fraction disappeared, indicating that the increased LMF response was largely driven by the reduction in plant size and not an active adjustment to resource limitation (**Table 1**).

Light limitation affected all morphological traits except for fine root diameter (FRD) (**Table 1**). The responses led to strong increases in acquisitive values for resource acquiring traits such as SLA (+40.5%, **Fig. 2a**), SRL (fine root, +31.8%, **Fig. 2b**; tap root +86.9%), and a moderate increase in plant height (Height, +15.0%) (**Table 2**). This was accompanied by strong decreases in organ dimensions, e.g., leaf thickness (LT, -10.8%), stem diameter (SD, -18.02%), tap root diameter (TRD, -28.84%), as well as tissue density assessed as leaf dry matter content (LDMC, -20.57%); stem tissue density (STD, -22.89%), fine root tissue density (FineRTD, -18.76%). After allometric scaling was factored out, the effect of light limitation on largely disappeared, indicating that the root trait adjustments were

mainly driven by allometric scaling (**Table 2**).

In contrast to the effect of light limitation, nutrient limitation affected only 4 out of 12 morphological traits (**Table 1**). Nutrient limitation decreased SD (-15.6%) and FRD (-7.3%), and increased the fine root specific root length (FineSRL, +19.8%) (**Fig. 2b, Table 2**) and TapRTD (+16.6%, **Table 2**). After allometric scaling was factored out, the effect of nutrient limitation on these traits remained, indicating active adjustments.

Similar to allocational and morphological traits, responses of anatomical traits to resource limitation were also organ-specific. Light limitation affected leaf, stem, and tap root anatomical traits, while nutrient limitation predominately affected fine root traits. More specifically for light limitation, aboveground traits responded by decreasing leaf palisade parenchyma layer thickness (LPT, -12.1%, **Fig. 3a**), stem cortex thickness (SCT, -11.6%), stem vascular bundle thickness (SVT, -26.2%, **Fig. 3b**) and stem xylem thickness (SXT, -24.7%) (**Table 2**). Belowground traits responded by reducing tap root cortex thickness (TRCT, -12.9%) and stele diameter (TRSD, -33.6%) (**Table 2**). Vascular tissue adjustment to light limitation led to changes in theoretical hydraulic conductivity, with for decreased leaf hydraulic conductivity (LKs, -19.0%) but increased stem hydraulic conductivity (SKs, +32.4%) (**Table 2**). After allometric scaling was factored out, the effect of light limitation on SCT, SVT, TRCT and TRSD was driven mainly by allometric scaling (**Table 2**), but there was active adjustment for greater stem and tap root hydraulic conductivity (SKs, +95.9%; TRKs, +94.1%) (**Table 2**).

In contrast to light limitation, nutrient limitation predominately affected fine root anatomy. Nutrient limitation decreased fine root cortex thickness (FRCT, -7.72%, **Fig. 3c**) and fine root stele diameter (FRSD, -7.95%) (**Table 2**). After allometric scaling was factored out, the effects of nutrient limitation on FRCT remained in both light conditions, however the effect of nutrient limitation on FRSD disappeared under low light condition (**Table 2**).

#### *Allometric and active trait plasticity*

Trait categories differed in magnitude and direction of plasticity depending on resource limitation (**Fig. 4**). Based on simple means per category in absolute relative distance plasticity index (RDPI), biomass allocational traits showed relatively larger magnitude in plasticity, followed by morphology, and last anatomy (**Fig. 4a**). On average, light limitation induced a higher RDPI values than nutrient limitation (**Fig. 4**). When allometric scaling is factored out, the average magnitude of RDPI values decreased for most traits (**Fig. S2**). Notable exceptions were, plant height, SKs and TRKs, for which RDPI increased after taking plant biomass into account indicating active and passive responses to be in opposite directions (**Fig. 4b, Fig. S2**).

#### *Coordinated trait adjustment to resource limitation*

When the genotypes means for traits in all three traits categories (allocation, morphology, and anatomy) and all treatments were included in a principal component analysis, the first two axis explained 34.4% and 13.4% of the variation (**Fig. 5a**). Light and nutrient limitations moved the key set of traits to be more acquisitive along the first and second axis, respectively, e.g., higher SLA under shade, higher FineSRL under nutrient limitation (**Fig. 5a**). Overall, light limitation triggered more pronounced coordinated trait adjustment than nutrient limitation (**Fig. 5a**). However, after allometric scaling was factored out, active coordinated trait responses to both light and nutrient limitation were more similar in scale and resource specific.

## Discussion

Here we assessed the impact of allometric scaling on the direction, magnitude, and coordination of allocation, morphological and anatomical trait responses to light or/and nutrient limitation in

cultivated sunflower. We found more biomass was allocated to the organs acquiring the most limiting resource (roots for nutrient stress and leaves for shade) and that morphological and anatomical trait adjustments generally led to more acquisitive trait values (higher SLA in shade and higher SRL in nutrient stress). Although portions of the plant trait responses were accounted for by allometric scaling (i.e., trait changes due lower biomass of stressed plants), there was additional active adjustments of key traits beyond allometric scaling. Interestingly, traits that showed the greatest active adjustment were traits that are not often discussed in relation to light or light or nutrient limitation, namely tap root and stem theoretical hydraulic conductance. We found evidence for coordination of both allometric and active adjustments for many traits in response to resource stress.

### *Plasticity and allometry*

Our results demonstrated that plants increase biomass allocation to the plant part acquiring the most limiting resource, both through allometric scaling and additional active responses (Bloom *et al.*, 1985; Poorter *et al.*, 2012). Lower light availability resulted in increased relative investment in aboveground plant organs (higher LMF and SMF) and lower nutrient availability resulted in increased relative investment in belowground (FineRMF). This allocation pattern has been confirmed in other growth forms (e.g., grasses, Siebenkäs *et al.*, 2015; shrubs, Valladares *et al.*, 2000; trees, Reich *et al.*, 1998, Kramer-Walter & Laughlin, 2017). Both morphology and anatomy adjustments resulted in a higher specific area of light and nutrient capture per biomass invested under each stress respectively. Additionally, anatomical adjustments in leaf and root, both decreased LPT and FRCT, reduce tissue metabolic and maintenance costs (Guo *et al.*, 2006, Galindo-Castañeda *et al.*, 2018; Jaramillo *et al.*, 2013). Thus, greater capacity for resource acquisition was coupled with reduced costs.

The relatively high SKs and TRKs in shaded plants was associated with the functional hydraulic continuum with taller plants. Both plant height and SLA of shaded plants were significantly greater than the control (**Tables 1, 2**), resulting in an increase in axial transportation distance and total transpiring surface. Theoretical hydraulic conductance, SKs and TRKs of shaded plant were increased by 95.9% and 94.1% when taking biomass into account indicating active adjustments beyond allometry (**Table 2**). This suggests that a coordinated increase in axial above- and below-ground hydraulic conductance offsets the greater transportation resistance (Plavcová & Hacke, 2012), ensuring efficient movement of carbon to roots and nutrients and water to leaves (Maurel *et al.*, 2010; Rodríguez-Gamir *et al.*, 2016; Wahl *et al.*, 2001).

Besides a response to resource limitation, many traits showed a strong correlation with plant biomass indicating allometric scaling, with larger plants having a thicker leaf, stem and tap root (**Table 1**). Consistent with Poorter *et al.* 2012, we found that light limitation effects were more accounted for by allometry than nutrient limitation effects. However, even when accounting for plant biomass by using total biomass as a covariate, treatment effects remained significant for major traits, such as SLA, FineSRL, LPT and FRCT, indicating active adjustments as well. This demonstrates that light and nutrient limitation had substantial active effect on plant adjustments to the major morphological and anatomical traits influencing resource acquisition indicate allometry. Generally, allometric adjustments went in a similar direction as the active adjustments (**Fig 3**). Thus, both allometric scaling as well as active trait adjustments were consistent with trait adjustments that serve to ameliorate some of the effects of resource limitation.

### *Magnitude of trait adjustments*

Consistent with other resource limitation studies, plasticity of mass allocational traits was largest, followed by morphological traits (Kramer-Walter & Laughlin, 2017, Valladares *et al.*, 2000), and

smallest in anatomical traits (Catoni *et al.*, 2015; Cai *et al.*, 2017; Xu *et al.*, 2015). It should be noted that differences in the extent of plasticity for different categories of traits may be species specific or based on the traits included. For example, oak (*Quercus robur*) seedlings were more plastic in physiological traits under shade, yet beech (*Fagus sylvatica*) was more plastic in morphological traits (Valladares *et al.*, 2002). Differences among trait categories for the magnitude of plasticity may reflect an inherent hierarchy originating from the internal structural framework of any specific organ. For example, leaf thickness is highly correlated with palisade parenchyma (Scoffoni *et al.*, 2015) and root diameter with cortex and/or stele thickness (Kong *et al.*, 2014). Thus, small shifts in individual component anatomical traits could add up to larger shifts in morphological traits which in turn affect allocational traits.

In general, pulling out allometric effects decreased the magnitude of morphological and anatomical traits adjustment. Only the RDPIs of the plant height, SKs and TRKs increased especially under shade when the allometry was accounted for (**Fig. 4, Fig. S2**). Given that height increased under shade, a higher efficiency of stem and root transportation could offset greater resistance due to a longer transportation distance (Plavcová & Hacke, 2012). It should be noted, however, that this increased stem Ks may come at the cost of increased risk of xylem embolism in shaded plants (Tyree & Zimmermann, 2002). However, the opposite response in leaf Ks provides a puzzling counterpoint that would be worth assessing in more experiments. Additionally, the anatomical dataset collected in this work provides an excellent resource for anatomical water flow models (Couvreur *et al.*, 2018) to further shed light on the consequences of these anatomical trait adjustments for plant hydraulics.

#### *Trait coordination and resource strategy*

Contrary to the evolutionarily conservative strategy generally expected under low resource conditions (Díaz *et al.*, 2016; Reich 2014), our results at the scale of environmentally induced plasticity showed that traits shift towards values generally thought to be resource acquisitive under stress (**Fig. 2-4; Table 1,2**), consistent with other resource manipulation studies for commonly measured traits (Freschet *et al.* 2015). Our plants growing under lower resource conditions, with lower biomass, had thinner leaves, stem, fine and tap roots, as well as narrower leaf palisade, stem vascular tissue, fine root cortex and tap root stele, but higher SLA and SRL. These coordinated trait shifts depended on the limiting resource or organ. For example, higher SLA and thinner LPT were only significant under shade, while higher FineSRL and thinner FRCT and FRSD were only significant under poor nutrient condition (**Table 2**). Thus, while there was some coordination, shifts were not such that the resource use strategy at the whole-plant level shifted from conservative to acquisitive, even though individual organs showed more acquisitive traits consistent with increased capture ability for the limiting resource.

#### *Conclusion*

Few studies have assessed the phenotypic response of whole plants in terms of biomass allocation, organ morphology and anatomy simultaneously, and even less under multiple resource limitation (Givnish 1988; Pratt *et al.*, 2010). Here, our research demonstrates that major traits from all three categories shift in response to resource limitation. The resource specific extent, direction, and coordination of the responses is driven not only by changes in plant size (allometric scaling), but often includes a variable amount of active adjustment that is sometimes, but not always, aligned in the same direction as the allometric component. The substantial contribution of allometric scaling to trait responses that are consistent with a functional increase in the uptake capacity of the most limiting resource suggests that both allometric and active trait adjustments need be considered as potentially adaptive.

## Acknowledgements

We would like to thank M. Boyd and K. Turner for assistance with plant growth and data collection, K. Bettinger, S. Chhajed, G. Manning, J. Parrilli, N. Reisinger and J. Kobylanski for assistance with experimental setup and data collection, and the greater Donovan lab group for comments that improved this study and manuscript. Additionally, we would like to thank the reviewers for their time and constructive comments. This work was financially supported by grant NSF1444522 to LAD and a China Scholarship Council (CSC) grant to YW.

## Author contributions

YW, AT, and LD designed the experiment. YW carried out the experiment and took all measurements. YW and AT analyzed the results. YW wrote the initial manuscript draft with revisions by AT and LD. All authors contributed to manuscript revision, and read and approved the submitted version

## Figure and table captions

**Table 1** Allocational, morphological, and anatomical traits across a factorial of light and nutrient limitation. Light/Shade, direct sun vs 50% shade. Rich/poor, high nutrients vs 10% nutrient concentration. Means $\pm$ SE of 10 genotypes estimated marginal mean (based on 5-6 replicates) from our split-plot design. Effects of genotype (G), light (L) and nutrient (N) stresses and their interactions (L $\times$ N) on plant traits data. With or without plant total biomass (Mass) as a covariate. \*\*\*:p<0.001, \*\*:p<0.01, \*:p<0.05, ns: not significant.

**Table 2** Relative shift in allocational, morphological, and anatomical traits across a factorial of light and nutrient limitation. Light/Shade, direct sun vs 50% shade. Rich/poor, high nutrients vs 10% nutrient concentration. Means $\pm$ SE of 10 genotypes relative shift in treat value as compared to Light-Rich treatment. Base values as measured and after correcting for the effect of biomass on trait value. Greyed out numbers are not significantly different from zero (T-test p>0.05).

**Figure 1.** Biomass and mass allocation of leaf, stem, tap root, and fine root tissue across a factorial of light and nutrient limitation. Light/Shade, direct sun vs 50% shade. Rich/poor, high nutrients vs 10% nutrient concentration. **(a)** Average whole plant biomass across genotypes (n=10), stacked by average tissue contribution. **(b)** Average mass allocation to tissue types per treatment. Error bars denote standard error across genotypes. Different letters represent significant (p<0.05) Tukey post hoc differences between treatments.

**Figure 2.** Leaf and fine root morphology across a factorial of light and nutrient limitation. Light/Shade, direct sun vs 50% shade. Rich/poor, high nutrients vs 10% nutrient concentration. **(a)** specific leaf area (SLA, cm<sup>2</sup> g<sup>-1</sup>), **(b)** specific root length (SRL, m g<sup>-1</sup>), **(c)** ratio of leaf area to root length (SLA/SRL, cm<sup>2</sup> m<sup>-1</sup>). Points indicate genotype (n=10) mean (n=5-6) at a given treatment. Boxplots show distribution of values. Different letters represent significant (p<0.05) Tukey post hoc differences between treatments.

**Figure 3.** Leaf, stem, and fine root anatomy across a factorial of light and nutrient limitation. Light/Shade, direct sun vs 50% shade. Rich/poor, high nutrients vs 10% nutrient concentration. **(a)** leaf palisade parenchyma thickness ( $\mu$ m), **(b)** stem vascular bundle width ( $\mu$ m), **(c)** fine root cortex thickness ( $\mu$ m). Points indicate genotype (n=10) mean (n=5-6) at a given treatment. Boxplots show distribution of values. Different letters represent significant (p<0.05) Tukey post hoc differences between treatments

**Figure 4.** Trait plasticity in response to resource limitation. Points indicate the average (n=10) relative

distance plasticity index (RDPI) in response to light limitation (dark blue, Shade-Rich) or nutrient limitation (light green, Light-Poor), or combined (light blue, Shade-Poor). Point size represents a T-test significance ( $p < 0.05$ ) of RDPI being different from zero (large points) or not (small points). **(a)** RDPI values taken from base measurements. **(b)** RDPI values when correcting trait values for biomass, allometry. Trait abbreviations and units as in Table 1.

**Figure 5.** Principal component analysis (PCA) of leaf, stem and roots traits in response to resource limitation. Light/Shade, direct sun vs 50% shade. Rich/poor, high nutrients vs 10% nutrient concentration. Panels represent **(a)** trait values as measured, **(b)** trait values after correcting for size scaling (allometric effects). Different letters indicate significant Hotellings-T test, after Bonferroni correction, between treatments on the first two principal components. Trait abbreviations and units as in Table 1.

## Supplementary materials

**Table S1.** List of genotypes used in this study, it's common name, the corresponding plant ID from the USDA GRIN Database for each genotype, and the market type of each genotype.

**Fig S1.** Comparison of light levels between shaded and unshaded treatment. On average the low-light treatment received 50% of the photon flux density of the high-light treatment. Light intensities in each treatment were measured with a handheld light meter (LI-189; LI-COR, Lincoln, NE). Readings were taken from 8:00 AM to 7:00 PM. The light sensor was held near the soil level in each plot. We presented representative data from May 15th, a cloud-free day.

**Fig S2.** Effect of accounting for size scaling in traits when calculating relative distance plasticity index (RDPI). RDPI changes are shown per treatment (Light/Shade, full sun/50% shade; Rich/Poor, full nutrients/10% nutrients) and whether RDPI measures were positive or negative when initially compared to control (Light-Rich). For positive RDPI values (traits that increase in trait value with stress) a positive change when taking size scaling into account shows that size scaling decreased apparent (as measured initially) plasticity (i.e taking size scaling into account shows increased plasticity). A negative change on the other hand shows that the apparent plasticity was enhanced by size scaling (i.e taking size scaling into account shows decreased plasticity). For negative RDPI values (traits that decrease in trait value with stress) the effect of the sign of change is reversed. Symbols indicate whether RDPI significance (different from zero) is gained (circles), lost (squares), or remains unchanged (triangles, when taking biomass into account).

**Fig S3.** Scaling relationship between biomass and trait value among and between genotypes and treatments. **(a)** Scaling relationships between individual plants per genotypes and treatment (dotted lines) and **(b)** scaling relationships between genotypes per treatment.

# References

- Bates D, Maechler M, Bolker B, Christensen RHB, Singmann H, Dai B, Scheipl F, Grothendieck G, Green P. 2018.** Package 'lme4'.
- Bloom AJ, Chapin FS, Mooney HA. 1985.** Resource limitation in plants - an economic analogy. *Annual Review of Ecology and Systematics* **16**: 363-392.
- Bowsher AW, Shelby KC, Ahmed I, Krall E, Reagan DJ, Najdowski MN, Donovan LA. 2017.** Genotype Rankings for Nutrient Stress Resistance are Unrelated to Stress Severity in Cultivated Sunflower (*Helianthus annuus* L.). *Journal of Agronomy and Crop Science* **203**(3): 241-253.
- Cai Q, Ji C, Yan Z, Jiang X, Fang J. 2017.** Anatomical responses of leaf and stem of *Arabidopsis thaliana* to nitrogen and phosphorus addition. *Journal of Plant Research* **130**(6): 1035-1045.
- Catoni R, Gratani L, Sartori F, Varone L, Granata MU. 2015.** Carbon gain optimization in five broadleaf deciduous trees in response to light variation within the crown: Correlations among morphological, anatomical and physiological leaf traits. *Acta Botanica Croatica* **74**(1): 71-94.
- Chatelet DS, Clement WL, Sack L, Donoghue MJ, Edwards EJ. 2013.** The evolution of photosynthetic anatomy in Viburnum (adoxaceae). *International Journal of Plant Sciences* **174**(9): 1277-1291.
- Chapin FSI. 1991.** Integrated responses of plants to stress a centralized system of physiological responses. *Bioscience* **41**(1): 29-36.
- Coleman JS, McConnaughay KDM, Ackerly DD. 1994.** Interpreting phenotypic variation in plants. *Trends in Ecology & Evolution* **9**(5): 187-191.
- Coleman JS, McConnaughay KDM, Bazza KA. 1993.** Elevated CO<sub>2</sub> and plant nitrogen-use: Is reduced tissue nitrogen concentration size- dependent. *Oecologia* **93**: 195-200.
- Couvreur V, Faget M, Lobet G, Javaux M, Chaumont F, Draye X. 2018.** Going with the flow: Multiscale insights into the composite nature of water transport in roots. *Plant Physiology* DOI:10.1104/pp.18.01006.
- Díaz S, Kattge J, Cornelissen JHC, Wright IJ, Lavorel S, Dray S, Reu B, Kleyer M, Wirth C, Colin Prentice I, Garnier E, Bönsch G, Westoby M, Poorter H, Reich PB, Moles AT, Dickie J, Gillison AN, Zanne AE, Chave J, Joseph Wright S, Sheremet Ev SN, Jactel H, Baraloto C, Cerabolini B, Pierce S, Shipley B, Kirkup D, Casanoves F, Joswig JS, Günther A, Falczuk V, Rüger N, Mahecha MD, Gorné LD. 2016.** The global spectrum of plant form and function. *Nature* **529**(7585): 167-171.
- Donovan LA, Mason CM, Bowsher AW, Goolsby EW, Ishibashi CDA, Cornwell W. 2014.** Ecological and evolutionary lability of plant traits affecting carbon and nutrient cycling. *Journal of Ecology* **102**(2): 302-314.
- Eissenstat DM, Achor DS. 1999.** Anatomical characteristics of roots of citrus rootstocks that vary in specific root length. *New Phytologist* **141**: 309-321.
- Fort F, Cruz P, Lecloux E, Bittencourt De Oliveira L, Stroia C, Theau J, Jouany C. 2016.** Grassland root functional parameters vary according to a community-level resource acquisition-conservation trade-off. *Journal of Vegetation Science* **27**: 749-758.
- Fortunel C, Fine PVA, Baraloto C. 2012.** Leaf, stem and root tissue strategies across 758 Neotropical tree species. *Functional Ecology* **26**: 1153-1161.
- Fox J, Weisberg S, Price B, Adler D, Bates D, Baud-Bovy G, Bolker B, Ellison S, Firth D, Friendly M, Gorjanc G, Graves S, Heriberger R, Laboissiere R. 2018.** Package 'car'.
- Freschet GT, Swart EM, Cornelissen JHC. 2015.** Integrated plant phenotypic responses to contrasting above- and below-ground resources: Key roles of specific leaf area and root mass fraction. *New Phytologist* **206**: 1247-1260.
- Freschet GT, Violle C, Bourget MY, Scherer-Lorenzen M, Fort F. 2018.** Allocation, morphology, physiology, architecture: The multiple facets of plant above- and below-ground responses to resource stress. *New Phytologist* **219**(4): 1338-1352.
- Galindo-Castañeda T, Brown KM, Lynch JP. 2018.** Reduced root cortical burden improves growth and grain yield under low phosphorus availability in maize. *Plant, Cell & Environment* **41**: 1579-1592.
- Givnish TJ. 1988.** Adaptation to sun and shade: A Whole-Plant perspective. *Australian Journal of Plant Physiology* **15**: 63-92.

- Gu J, Xu Y, Dong X, Wang H, Wang Z. 2014.** Root diameter variations explained by anatomy and phylogeny of 50 tropical and temperate tree species. *Tree Physiology* **34**(4): 415-425.
- Guo D, Xia M, Wei X, Chang W, Liu Y, Wang Z. 2008.** Anatomical traits associated with absorption and mycorrhizal colonization are linked to root branch order in twenty-three Chinese temperate tree species. *New Phytologist* **180**(3): 673-683.
- Hill JO, Simpson RJ, Moore AD, Chapman DF. 2006.** Morphology and response of roots of pasture species to phosphorus and nitrogen nutrition. *Plant and Soil* **286**(1-2): 7-19.
- Jaramillo RE, Nord EA, Chimungu JG, Brown KM, Lynch JP. 2013.** Root cortical burden influences drought tolerance in maize. *Annals of Botany* **112**(2): 429-437.
- John GP, Scoffoni C, Buckley TN, Villar R, Poorter H, Sack L. 2017.** The anatomical and compositional basis of leaf mass per area. *Ecology Letters* **20**(4): 412-425.
- Kong D, Ma C, Zhang Q, Li L, Chen X, Zeng H, Guo D. 2014.** Leading dimensions in absorptive root trait variation across 96 subtropical forest species. *New Phytologist* **203**(3): 863-872.
- Kramer-Walter KR, Bellingham PJ, Millar TR, Smissen RD, Richardson SJ, Laughlin DC. 2016.** Root traits are multidimensional: Specific root length is independent from root tissue density and the plant economic spectrum. *Journal of Ecology* **104**(5): 1299-1310.
- Kramer-Walter KR, Laughlin DC. 2017.** Root nutrient concentration and biomass allocation are more plastic than morphological traits in response to nutrient limitation. *Plant and Soil* **416**(1-2): 539-550.
- Lenth R, Singmann H, Love J, Buerkner P, Herve M, Abd Allah EF. 2018.** Package 'emmeans'.
- Mandel JR, Dechaine JM, Marek LF, Burke JM. 2011.** Genetic diversity and population structure in cultivated sunflower and a comparison to its wild progenitor, *Helianthus annuus* L. *Theoretical and Applied Genetics* **123**(5): 693-704.
- Masalia RR, Temme AA, Torralba NDL, Burke JM. 2018.** Multiple genomic regions influence root morphology and seedling growth in cultivated sunflower (*Helianthus annuus* L.) under well-watered and water-limited conditions. *PLoS One* **13**(9): e204279.
- Maurel C, Simonneau T, Sutka M. 2010.** The significance of roots as hydraulic rheostats. *Journal of Experimental Botany* **61**(12): 3191-3198.
- Müller I, Schmid B, Weiner J. 2000.** The effect of nutrient availability on biomass allocation patterns in 27 species of herbaceous plants. *Perspectives in Plant Ecology, Evolution and Systematics* **3**(2): 115-127.
- Nambeesan SU, Mandel JR, Bowers JE, Marek LF, Ebert D, Corbi J, Rieseberg LH, Knapp SJ, Burke JM. 2015.** Association mapping in sunflower (*Helianthus annuus* L.) reveals independent control of apical vs. Basal branching. *BMC Plant Biology* **15**(1):84.
- Nicotra AB, Atkin OK, Bonser SP, Davidson AM, Finnegan EJ, Mathesius U, Poot P, Purugganan MD, Richards CL, Valladares F, van Kleunen M. 2010.** Plant phenotypic plasticity in a changing climate. *Trends in Plant Science* **15**(12): 684-692.
- Niinemets Ü, Kahru A, Mander Ü, Nöges P, Nöges T, Tuvikene A, Vasemägi A. 2017.** Interacting environmental and chemical stresses under global change in temperate aquatic ecosystems: Stress responses, adaptation, and scaling. *Regional Environmental Change* **17**(7): 2061-2077.
- Pilote. 2017.** Ecological and evolutionary patterns among stem and leaf functional traits in *Helianthus*. The University of Georgia.
- Plavcov L, Hacke UG. 2012.** Phenotypic and developmental plasticity of xylem in hybrid poplar saplings subjected to experimental drought, nitrogen fertilization, and shading. *Journal of Experimental Botany* **63**(18): 6481-6491.
- Poorter H, Niklas KJ, Reich PB, Oleksyn J, Poot P, Mommer L. 2012.** Biomass allocation to leaves, stems and roots: Meta-analyses of interspecific variation and environmental control. *New Phytologist* **193**(1): 30-50.
- Poorter H, Niinemets Ü, Ntagkas N, Siebenkäs A, Mäenpää M, Matsubara S, Pons TL. 2019.** A meta-analysis of plant responses to light intensity for 70 traits ranging from molecules to whole plant performance. *New Phytologist* **223**: 1073– 1105.

- Pratt RB, North GB, Jacobsen AL, Ewers FW, Davis SD. 2010. Xylem root and shoot hydraulics is linked to life history type in chaparral seedlings. *Functional Ecology* **24**(1): 70-81.
- Reich PB. 2014. The world-wide 'fast-slow' plant economics spectrum: A traits manifesto. *Journal of Ecology* **102**(2): 275-301.
- Reich PB. 2018. Do plants increase resource acquisition potential in the face of resource shortfalls, and if so, how? *New Phytologist* **219**(4): 1142-1144.
- Reich PB, Tjoelker MG, Walters MB, Vanderklein DW, Bushena C. 1998. Close association of RGR, leaf and root morphology, seed mass and shade tolerance in seedlings of nine boreal tree species grown in high and low light. *Functional Ecology* **12**(3): 327-338.
- Rice SA, Bazzaz FA. 1989. Quantification of plasticity of plant traits in response to light-intensity - comparing phenotypes at a common weight. *Oecologia* **78**(4): 502-507.
- Rodríguez-Gamir J, Primo-Millo E, Forner-Giner MÁ. 2016. An integrated view of Whole-Tree hydraulic architecture. Does stomatal or hydraulic conductance determine whole tree transpiration? *PLoS One* **11**(5): e155246.
- Robinson D, Davidson H, Trinder C, Brooker R. 2010. Root-shoot growth responses during interspecific competition quantified using allometric modelling. *Annals of Botany* **106**(6): 921-926.
- Ryser P, Eek L. 2000. Consequences of phenotypic plasticity vs. Interspecific differences in leaf and root traits for acquisition of aboveground and belowground resources1. *American Journal of Botany* **3**(87): 402-411.
- Scoffoni C, Kunkle J, Pasquet-Kok J, Vuong C, Patel AJ, Montgomery RA, Givnish TJ, Sack L. 2015. Light-induced plasticity in leaf hydraulics, venation, anatomy, and gas exchange in ecologically diverse Hawaiian lobeliads. *New Phytologist* **207**(1): 43-58.
- Shipley B, Meziane D. 2002. The balanced-growth hypothesis and the allometry of leaf and root biomass allocation. *Functional Ecology* **16**(3): 326-331.
- Siebenkaes A, Schumacher J, Roscher C. 2015. Phenotypic plasticity to light and nutrient availability alters functional trait ranking across eight perennial grassland species. *AoB Plants* **7**(plv029).
- Sugiura D, Tateno M. 2011. Optimal Leaf-to-Root ratio and leaf nitrogen content determined by light and nitrogen availabilities. *PLoS One* **6**(e222367).
- Sun Q, Yoda K, Suzuki S. 2005. Internal axial light conduction in the stems and roots of herbaceous plants. *Journal of Experimental Botany* **409**(56): 191-203.
- Temme AA, Liu JC, van Hal J, Cornwell WK, Cornelissena JHHC, Aerts R. 2017. Increases in CO<sub>2</sub> from past low to future high levels result in "slower" strategies on the leaf economic spectrum. *Perspectives in Plant Ecology Evolution and Systematics* **29**: 41-50.
- Tyree MT, Ewers FW. 1991. The hydraulic architecture of trees and other woody-plants. *New Phytologist* **119**(3): 345-360.
- Tyree MT, Zimmermann MH. 2002. Xylem structure and the ascent of sap. *Springer Series in Wood Science*: Springer, pp:229-235.
- Valladares F, Chico JM, Aranda I, Balaguer L, Dizengremel P, Manrique E, Dreyer E. 2002. The greater seedling high-light tolerance of *Quercus robur* over *Fagus sylvatica* is linked to a greater physiological plasticity. *Trees-Structure and Function* **16**(6): 395-403.
- Valladares F, Gianoli E, Gómez JM. 2007. Ecological limits to plant phenotypic plasticity. *New Phytologist* **176**(4): 749-763.
- Valladares F, Sanchez-Gomez D, Zavala MA. 2006. Quantitative estimation of phenotypic plasticity: Bridging the gap between the evolutionary concept and its ecological applications. *Journal of Ecology* **94**(6): 1103-1116.
- Valladares F, Wright SJ, Lasso E, Kitajima K, Pearcy RW. 2000. Plastic phenotypic response to light of 16 congeneric shrubs from a Panamanian rainforest. *Ecology* **81**(7): 1925-1936.
- Violle C, Navas M, Vile D, Kazakou E, Fortunel C, Hummel I, Garnier E. 2007. Let the concept of trait be functional! *Oikos* **116**(5): 882-892.
- Wickham H, Chang W, Henry L, Pederson TL, Takahashi K, Winkle C, Woo K. 2018. Package 'ggplot2'.

- Wilson PJ, Thompson K, Hodgson JG. 1999.** Specific leaf area and leaf dry matter content as alternative predictors of plant strategies. *New Phytologist* **143**(1): 155-162.
- Wright IJ, Reich PB, Westoby M, Ackerly DD, Baruch Z, Bongers F, Cavender-Bares J, Chapin T, Cornelissen JH, Diemer M, Flexas J, Garnier E, Groom PK, Gulias J, Hikosaka K, Lamont BB, Lee T, Lee W, Lusk C, Midgley JJ, Navas ML, Niinemets U, Oleksyn J, Osada N, Poorter H, Poot P, Prior L, Pyankov VI, Roumet C, Thomas SC, Tjoelker MG, Veneklaas EJ, Villar R. 2004.** The worldwide leaf economics spectrum. *Nature* **428**(6985): 821-827.
- Xu N, Wang R, Liu J, Lu P, Guo W. 2015.** Hierarchy of plasticity traits in responses of *Quercus aliena* to light conditions and water availability. *Dendrobiology* **74**: 169-180.

594  
595  
596  
597

**Table 1** Allocational, morphological, and anatomical traits across a factorial of light and nutrient limitation. Light/Shade, direct sun vs 50% shade. Rich/poor, high nutrients vs 10% nutrient concentration. Means±SE of 10 genotypes estimated marginal mean (based on 5-6 replicates) from our split-plot design. Effects of genotype (G), light (L) and nutrient (N) stresses and their interactions (L×N) on plant traits data. With or without plant total biomass (Mass) as a covariate. \*\*\*:p<0.001, \*\*:p<0.01, \*:p<0.05, ns: not significant. Letters denote Tukey test post-hoc differences between treatments.

| Category   | Trait                       | Unit                                                   | Light-Rich                 | Light-Poor                 | Shade-Rich                | Shade-Poor                | Statistics |    |    |     | -including biomass |     |     |     |     |     |
|------------|-----------------------------|--------------------------------------------------------|----------------------------|----------------------------|---------------------------|---------------------------|------------|----|----|-----|--------------------|-----|-----|-----|-----|-----|
|            |                             |                                                        |                            |                            |                           |                           | G          | L  | N  | L×N | Mass               | G   | M×G | L   | N   | L×N |
| Allocation | Total Biomass               | g                                                      | 1.70±0.14 <sup>a</sup>     | 1.28±0.07 <sup>b</sup>     | 0.77±0.05 <sup>c</sup>    | 0.56±0.05 <sup>d</sup>    | **         | ** | ** | ns  | n/a                | n/a | n/a | n/a | n/a | n/a |
|            | Leaf mass fraction          | g·g <sup>-1</sup>                                      | 0.68±0.006 <sup>a</sup>    | 0.59±0.001 <sup>b</sup>    | 0.70±0.01 <sup>c</sup>    | 0.66±0.01 <sup>d</sup>    | **         | ** | ** | **  | ns                 | *** | *** | ns  | *** | *** |
|            | Stem mass fraction          | g·g <sup>-1</sup>                                      | 0.16±0.009 <sup>a</sup>    | 0.16±0.009 <sup>b</sup>    | 0.20±0.001 <sup>c</sup>   | 0.21±0.02 <sup>b</sup>    | **         | ** | ns | *   | ns                 | *** | **  | *** | ns  | **  |
|            | Fine root mass fraction     | g·g <sup>-1</sup>                                      | 0.13±0.007 <sup>a</sup>    | 0.21±0.001 <sup>b</sup>    | 0.074±0.004 <sup>c</sup>  | 0.10±0.007 <sup>d</sup>   | **         | ** | ** | **  | ns                 | *** | *** | *** | *** | *** |
|            | Tap root mass fraction      | g·g <sup>-1</sup>                                      | 0.04±0.002 <sup>a</sup>    | 0.04±0.003 <sup>b</sup>    | 0.027±0.002 <sup>a</sup>  | 0.03±0.002 <sup>b</sup>   | **         | ** | ns | ns  | ns                 | *** | ns  | *** | ns  | ns  |
|            | Ratio of leaf and fine root |                                                        | 5.58±0.33 <sup>a</sup>     | 2.93±0.22 <sup>b</sup>     | 9.96±0.65 <sup>c</sup>    | 6.58±0.40 <sup>a</sup>    | **         | ** | ** | **  | ns                 | *** | ns  | *** | *** | ns  |
| Morphology | Ratio of SLA and FineSRL    |                                                        | 1.30±0.07 <sup>ab</sup>    | 1.13±0.06 <sup>b</sup>     | 1.50±0.11 <sup>a</sup>    | 1.23±0.04 <sup>b</sup>    | **         | *  | *  | ns  | ns                 | *** | ns  | *   | ns  | ns  |
|            | Leaf thickness              | µm                                                     | 257.71±8.38 <sup>a</sup>   | 248.87±7.23 <sup>b</sup>   | 228.86±4.75 <sup>a</sup>  | 227.24±6.37 <sup>b</sup>  | **         | ** | ns | ns  | *                  | *** | ns  | *** | ns  | ns  |
|            | Specific leaf area          | cm <sup>2</sup> ·g <sup>-1</sup>                       | 349.53±11.04 <sup>a</sup>  | 362.46±6.47 <sup>b</sup>   | 487.72±8.96 <sup>a</sup>  | 493.42±18.32 <sup>b</sup> | **         | ** | ns | ns  | **                 | *** | ns  | *** | ns  | ns  |
|            | Leaf dry mass content       | mg·g <sup>-1</sup>                                     | 102.95±2.66 <sup>a</sup>   | 106.92±2.55 <sup>b</sup>   | 87.33±2.78 <sup>a</sup>   | 90.91±2.69 <sup>b</sup>   | ns         | ** | ns | ns  | ns                 | *** | ns  | *** | ns  | ns  |
|            | Stem diameter               | mm                                                     | 5.23±0.18 <sup>a</sup>     | 4.65±0.10 <sup>b</sup>     | 4.30±0.13 <sup>c</sup>    | 3.88±0.11 <sup>a</sup>    | **         | ** | ** | ns  | ***                | *** | *** | ns  | *** | *** |
|            | Stem tissue density         | g·cm <sup>-3</sup>                                     | 0.039±0.003 <sup>a</sup>   | 0.037±0.002 <sup>b</sup>   | 0.028±0.001 <sup>a</sup>  | 0.031±0.002 <sup>ab</sup> | *          | ** | ns | ns  | ns                 | ns  | ns  | *   | ns  | ns  |
|            | Fine root diameter          | µm                                                     | 404.95±8.32 <sup>a</sup>   | 374.96±8.15 <sup>b</sup>   | 388.27±1.95 <sup>c</sup>  | 348.22±8.61 <sup>ab</sup> | **         | ns | ** | ns  | ns                 | *** | ns  | ns  | **  | ns  |
|            | Specific fine root length   | m·g <sup>-1</sup>                                      | 288.10±11.34 <sup>a</sup>  | 342.28±17.57 <sup>b</sup>  | 377.10±21.55 <sup>c</sup> | 423.75±23.45 <sup>a</sup> | **         | ** | ** | ns  | ns                 | *** | ns  | *   | *   | ns  |
|            | Fine root tissue density    | g·cm <sup>-3</sup>                                     | 0.033±0.002 <sup>a</sup>   | 0.033±0.001 <sup>b</sup>   | 0.027±0.002 <sup>a</sup>  | 0.028±0.001 <sup>ab</sup> | **         | ** | ns | ns  | ns                 | *** | ns  | ns  | ns  | ns  |
|            | Tap root diameter           | µm                                                     | 1337.49±62.57 <sup>a</sup> | 1228.76±59.19 <sup>b</sup> | 937.87±42.74 <sup>a</sup> | 900.58±36.41 <sup>b</sup> | **         | ** | ns | ns  | **                 | *** | *   | ns  | ns  | *   |
|            | Specific tap root length    | m·g <sup>-1</sup>                                      | 4.46±0.43 <sup>a</sup>     | 5.04±0.56 <sup>b</sup>     | 7.35±0.90 <sup>c</sup>    | 10.51±2.06 <sup>ab</sup>  | **         | ** | ns | ns  | *                  | *   | ns  | ns  | ns  | ns  |
|            | Tap root tissue density     | g·cm <sup>-3</sup>                                     | 0.037±0.002 <sup>a</sup>   | 0.043±0.002 <sup>a</sup>   | 0.033±0.002 <sup>b</sup>  | 0.033±0.002 <sup>a</sup>  | **         | ** | ** | *   | ns                 | *** | *   | ns  | *** | *   |
|            | Height                      | cm                                                     | 14.62±0.82 <sup>a</sup>    | 14.33±0.93 <sup>b</sup>    | 16.75±1.11 <sup>a</sup>   | 16.43±1.64 <sup>b</sup>   | **         | ** | ns | ns  | ***                | *** | ns  | *** | *   | ns  |
| Anatomy    | Leaf palisade thickness     | µm                                                     | 141.35±4.60 <sup>a</sup>   | 136.74±4.61 <sup>b</sup>   | 124.16±3.96 <sup>c</sup>  | 122.22±3.20 <sup>ab</sup> | **         | ** | ns | ns  | ns                 | *** | ns  | *   | ns  | ns  |
|            | Leaf spongy thickness       | µm                                                     | 79.96±4.93 <sup>ab</sup>   | 74.11±4.63 <sup>b</sup>    | 70.79±2.85 <sup>a</sup>   | 73.60±4.85 <sup>ab</sup>  | **         | ** | *  | *   | *                  | *** | *   | **  | *   | *   |
|            | Leaf Ks                     | kg·s <sup>-1</sup> ·m <sup>-1</sup> ·MPa <sup>-1</sup> | 4.55±0.45 <sup>a</sup>     | 4.27±0.53 <sup>b</sup>     | 3.66±0.42 <sup>a</sup>    | 3.34±0.33 <sup>ab</sup>   | **         | ** | ns | ns  | ns                 | *** | ns  | ns  | ns  | ns  |
|            | Stem cortex thickness       | µm                                                     | 262.41±15.68 <sup>a</sup>  | 266.45±12.93 <sup>b</sup>  | 227.65±11.37 <sup>a</sup> | 225.16±10.32 <sup>b</sup> | **         | ** | ns | ns  | **                 | *** | ns  | ns  | ns  | ns  |
|            | Stem vascular thickness     | µm                                                     | 651.28±22.70 <sup>a</sup>  | 593.58±21.77 <sup>b</sup>  | 479.75±21.92 <sup>c</sup> | 436.78±19.99 <sup>d</sup> | **         | ** | ** | ns  | ***                | *** | *   | **  | ns  | *   |
|            | Stem xylem thickness        | µm                                                     | 314.49±11.57 <sup>a</sup>  | 293.74±7.17 <sup>b</sup>   | 234.98±9.27 <sup>a</sup>  | 205.33±8.60 <sup>c</sup>  | **         | ** | ns | *   | ***                | *** | ns  | ns  | ns  | ns  |
|            | Stem Ks                     | kg·s <sup>-1</sup> ·m <sup>-1</sup> ·MPa <sup>-1</sup> | 8.62±0.77 <sup>ab</sup>    | 9.86±0.89 <sup>a</sup>     | 11.12±1.11 <sup>b</sup>   | 9.56±1.09 <sup>ab</sup>   | **         | ** | ns | *   | ***                | *** | ns  | *** | **  | ns  |
|            | Fine root cortex thickness  | µm                                                     | 136.38±2.99 <sup>a</sup>   | 125.46±3.58 <sup>b</sup>   | 127.44±4.13 <sup>a</sup>  | 113.25±2.07 <sup>a</sup>  | *          | ns | *  | ns  | ns                 | **  | ns  | ns  | *   | ns  |
|            | Fine stele diameter         | µm                                                     | 113.38±5.27 <sup>ab</sup>  | 103.50±4.28 <sup>b</sup>   | 111.68±5.01 <sup>a</sup>  | 104.40±4.44 <sup>ab</sup> | **         | ns | ** | ns  | ns                 | *** | ns  | ns  | *   | ns  |
|            | Fine root Ks                | kg·s <sup>-1</sup> ·m <sup>-1</sup> ·MPa <sup>-1</sup> | 0.54±0.07 <sup>a</sup>     | 0.63±0.16 <sup>a</sup>     | 0.66±0.15 <sup>a</sup>    | 0.64±0.13 <sup>a</sup>    | **         | ns | ns | ns  | *                  | *** | ns  | ns  | ns  | ns  |
|            | Tap root cortex thickness   | µm                                                     | 209.14±8.67 <sup>a</sup>   | 209.20±8.06 <sup>b</sup>   | 182.66±13.98 <sup>a</sup> | 186.40±9.60 <sup>ab</sup> | **         | ** | ns | ns  | ns                 | *** | ns  | ns  | ns  | ns  |
|            | Tap root stele diameter     | µm                                                     | 888.75±60.60 <sup>a</sup>  | 769.73±44.59 <sup>b</sup>  | 569.64±22.97 <sup>c</sup> | 517.38±30.58 <sup>a</sup> | **         | ** | ** | ns  | **                 | *** | *   | ns  | ns  | *   |
|            | Tap root Ks                 | kg·s <sup>-1</sup> ·m <sup>-1</sup> ·MPa <sup>-1</sup> | 27.16±4.14 <sup>a</sup>    | 28.32±4.08 <sup>a</sup>    | 29.43±3.84 <sup>a</sup>   | 30.49±4.31 <sup>a</sup>   | **         | ns | ns | ns  | ns                 | *** | ns  | **  | ns  | ns  |

598

599 **Table 2** Relative shift in allocational, morphological, and anatomical traits across a factorial of light and nutrient limitation. Light/Shade, direct sun vs 50%  
600 shade. Rich/poor, high nutrients vs 10% nutrient concentration. Means±SE of 10 genotypes relative shift in treat value as compared to Light-Rich treatment.  
601 Base values as measured and after correcting for the effect of biomass on trait value. Greyed out numbers are not significantly different from zero (T-test  
602  $p>0.05$ ).

| Category   | Trait                       | Abbreviation    | Unit                                                                | Light-Poor      |                     | Shade-Rich      |                     | Shade-Poor      |                     |
|------------|-----------------------------|-----------------|---------------------------------------------------------------------|-----------------|---------------------|-----------------|---------------------|-----------------|---------------------|
|            |                             |                 |                                                                     | Base $\Delta\%$ | Mass cor $\Delta\%$ | Base $\Delta\%$ | Mass cor $\Delta\%$ | Base $\Delta\%$ | Mass cor $\Delta\%$ |
| Allocation | Total Biomass               | TotalBiomass    | g                                                                   | -21.43±(5.94)   |                     | -53.25±(3.14)   |                     | -65.82±(2.81)   |                     |
|            | Leaf mass fraction          | LMF             | $\text{g}\cdot\text{g}^{-1}$                                        | -12.06±(1.97)   | -12.85±(1.85)       | 3.67±(1.47)     | 0.37±(1.39)         | -2.94±(1.88)    | -7.62±(1.7)         |
|            | Stem mass fraction          | SMF             | $\text{g}\cdot\text{g}^{-1}$                                        | -2.07±(4.09)    | -1.95±(4.08)        | 23.97±(3.81)    | 24.4±(3.8)          | 32.92±(5.55)    | 33.57±(5.53)        |
|            | Fine root mass fraction     | FineRMF         | $\text{g}\cdot\text{g}^{-1}$                                        | 71.42±(10.45)   | 84.47±(12.91)       | -41.36±(3.29)   | -27.23±(4.67)       | -19.59±(5.56)   | 4.82±(7.78)         |
|            | Tap root mass fraction      | TapRMF          | $\text{g}\cdot\text{g}^{-1}$                                        | 6.81±(3.73)     | 7.92±(3.72)         | -21.21±(3.7)    | -18.49±(3.87)       | -12.85±(5.86)   | -8.57±(6.07)        |
|            | Ratio of leaf and fine root | LFRratio        |                                                                     | -45.65±(5.3)    | -47.15±(4.95)       | 82.61±(13.59)   | 53.12±(11.61)       | 20.81±(8.55)    | -12.25±(7.04)       |
|            | Ratio of SLA and FineSRL    | SLAFineSRLratio |                                                                     | -12.1±(4.1)     | -12.59±(4.04)       | 16.35±(6.65)    | 14.37±(6.73)        | -3.39±(4.77)    | -6.12±(4.66)        |
| Morphology | Leaf thickness              | LT              | mm                                                                  | -3.11±(2.33)    | -3.16±(2.33)        | -10.8±(1.64)    | -10.98±(1.63)       | -11.47±(2.1)    | -11.73±(2.1)        |
|            | Specific leaf area          | SLA             | $\text{cm}^2\cdot\text{g}^{-1}$                                     | 4.25±(2.36)     | 0.85±(2.84)         | 40.53±(4.17)    | 27.59±(3.34)        | 42.24±(6.03)    | 24.2±(4.83)         |
|            | Leaf dry mass content       | LTD             | $\text{mg}\cdot\text{g}^{-1}$                                       | -0.69±(3.82)    | 2.47±(4.22)         | -20.57±(3.42)   | -12.26±(3.92)       | -19.82±(4.36)   | -7.12±(4.97)        |
|            | Stem diameter               | SD              | mm                                                                  | -15.6±(3.82)    | -11.26±(2.55)       | -18.02±(3.42)   | 0.25±(2.77)         | -27.56±(3.96)   | -1.15±(2.57)        |
|            | Stem tissue density         | SDensity        | $\text{g}\cdot\text{cm}^{-3}$                                       | -0.21±(6.89)    | 3.96±(7.23)         | -22.89±(5.73)   | -12.55±(6.33)       | -17.62±(4.13)   | -1.74±(4.94)        |
|            | Fine root diameter          | FRD             | mm                                                                  | -7.25±(1.85)    | -7.1±(1.82)         | -3.91±(3.02)    | -3.32±(3.01)        | -13.82±(2.15)   | -12.96±(2.11)       |
|            | Specific fine root length   | FineSRL         | $\text{m}\cdot\text{g}^{-1}$                                        | 19.82±(6.72)    | 15.72±(6.44)        | 31.81±(7.99)    | 19.58±(6.31)        | 50.35±(13.43)   | 32.56±(11.54)       |
|            | Fine root tissue density    | FineRTD         | $\text{g}\cdot\text{cm}^{-3}$                                       | 2.22±(5.63)     | 5.59±(6.3)          | -18.76±(4.39)   | -10.31±(4.38)       | -13.92±(3.33)   | -0.44±(4.35)        |
|            | Tap root diameter           | TRD             | mm                                                                  | -6.2±(6.59)     | 1.13±(6.2)          | -28.84±(4.18)   | -1.62±(6.83)        | -31.25±(4.05)   | 9.52±(6.25)         |
|            | Specific tap root length    | TapSRL          | $\text{m}\cdot\text{g}^{-1}$                                        | 16.66±(10.54)   | -1.91±(11.5)        | 86.92±(35.39)   | -7.72±(13.43)       | 163.95±(39.39)  | 25.7±(18.47)        |
|            | Tap root tissue density     | TapRTD          | $\text{g}\cdot\text{cm}^{-3}$                                       | 16.56±(5.96)    | 22.11±(6.1)         | -11.38±(6.17)   | 0.99±(6.59)         | -9.65±(5.94)    | 9.51±(6.55)         |
|            | Height                      | Height          | cm                                                                  | -0.28±(6.84)    | 6.26±(4.95)         | 15.04±(5.91)    | 41.59±(4.38)        | 11.95±(9.83)    | 50.23±(7.5)         |
| Anatomy    | Leaf palisade thickness     | LPT             | mm                                                                  | -2.95±(2.64)    | -2.43±(2.63)        | -12.05±(1.28)   | -10.27±(1.3)        | -13.1±(2.23)    | -10.49±(2.18)       |
|            | Leaf spongy thickness       | LST             | mm                                                                  | -7±(3.2)        | -6.74±(3.24)        | -10.34±(2.82)   | -9.42±(2.85)        | -7.61±(3.53)    | -6.26±(3.56)        |
|            | Leaf Ks                     | LKs             | $\text{kg}\cdot\text{s}^{-1}\cdot\text{m}^{-1}\cdot\text{MPa}^{-1}$ | -8.09±(4.91)    | 0.01±(6.03)         | -19.02±(5.46)   | 9.59±(6.3)          | -25.09±(6.07)   | 18.45±(9.99)        |
|            | Stem cortex thickness       | SCT             | mm                                                                  | 3.82±(6.52)     | 6.77±(6.05)         | -11.57±(4.97)   | -1.25±(5.33)        | -12.06±(5.51)   | 3.39±(6.16)         |
|            | Stem vascular thickness     | SVT             | mm                                                                  | -8.7±(2.17)     | -1.97±(2.65)        | -26.2±(2.78)    | -4.41±(2.89)        | -32.68±(2.93)   | 0.41±(3.59)         |
|            | Stem xylem thickness        | SXT             | mm                                                                  | -5.83±(3)       | 0.83±(2.32)         | -24.69±(3.24)   | -2.39±(3.52)        | -34.18±(2.98)   | -1±(3.07)           |
|            | Stem Ks                     | SKs             | $\text{kg}\cdot\text{s}^{-1}\cdot\text{m}^{-1}\cdot\text{MPa}^{-1}$ | 17.4±(8.3)      | 39.01±(11.45)       | 32.36±(10.82)   | 95.94±(17.02)       | 19.83±(18.39)   | 107.23±(29.44)      |
|            | Fine root cortex thickness  | FRCT            | mm                                                                  | -7.72±(2.86)    | -7.26±(2.86)        | -5.9±(4.28)     | -4.18±(4.3)         | -16.43±(2.97)   | -13.93±(2.94)       |
|            | Fine stele diameter         | FRSD            | mm                                                                  | -7.95±(3.29)    | -7.75±(3.26)        | -1.14±(2.58)    | -0.35±(2.55)        | -7.31±(3.07)    | -6.14±(3.07)        |
|            | Fine root Ks                | FRKs            | $\text{kg}\cdot\text{s}^{-1}\cdot\text{m}^{-1}\cdot\text{MPa}^{-1}$ | 14.42±(26.24)   | 14.31±(26.19)       | 30.55±(24.63)   | 30.06±(24.56)       | 17.28±(15.36)   | 16.67±(15.32)       |
|            | Tap root cortex thickness   | TRCT            | mm                                                                  | 0.77±(3.86)     | 8.32±(3.17)         | -12.93±(5.06)   | 11.5±(7.25)         | -10.59±(3.93)   | 24.66±(4.63)        |
|            | Tap root stele diameter     | TRSD            | mm                                                                  | -10.47±(7.24)   | -1.01±(9.76)        | -33.64±(4.96)   | -0.47±(11.43)       | -39.98±(4.24)   | 9.48±(11.54)        |
|            | Tap root Ks                 | TRKs            | $\text{kg}\cdot\text{s}^{-1}\cdot\text{m}^{-1}\cdot\text{MPa}^{-1}$ | 9.34±(7.58)     | 34.04±(18.67)       | 18.56±(11.35)   | 94.08±(32.24)       | 21.85±(12.56)   | 128.2±(40.12)       |

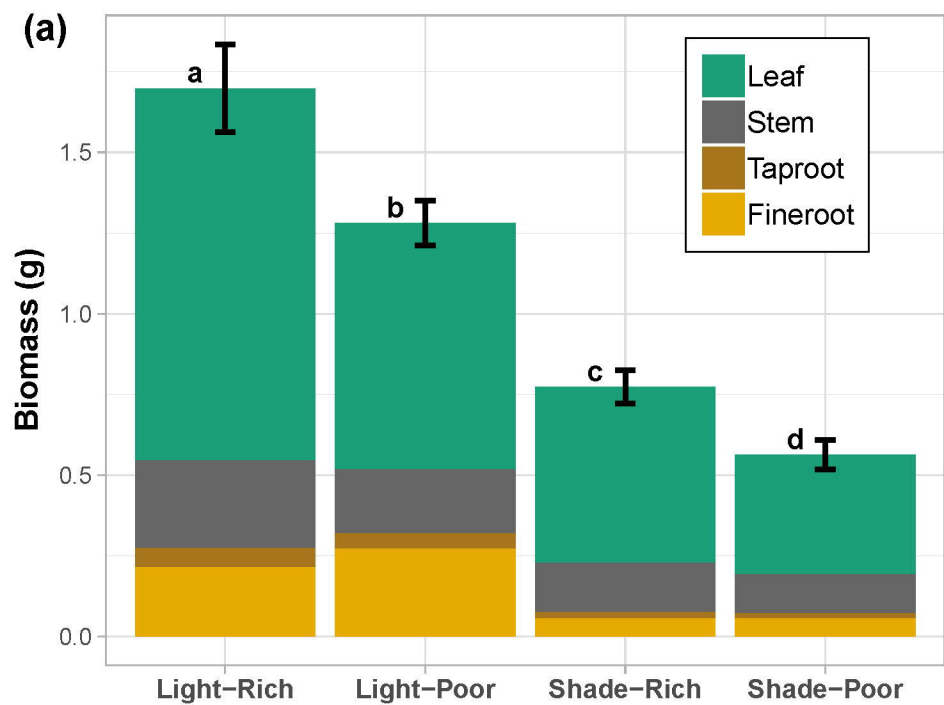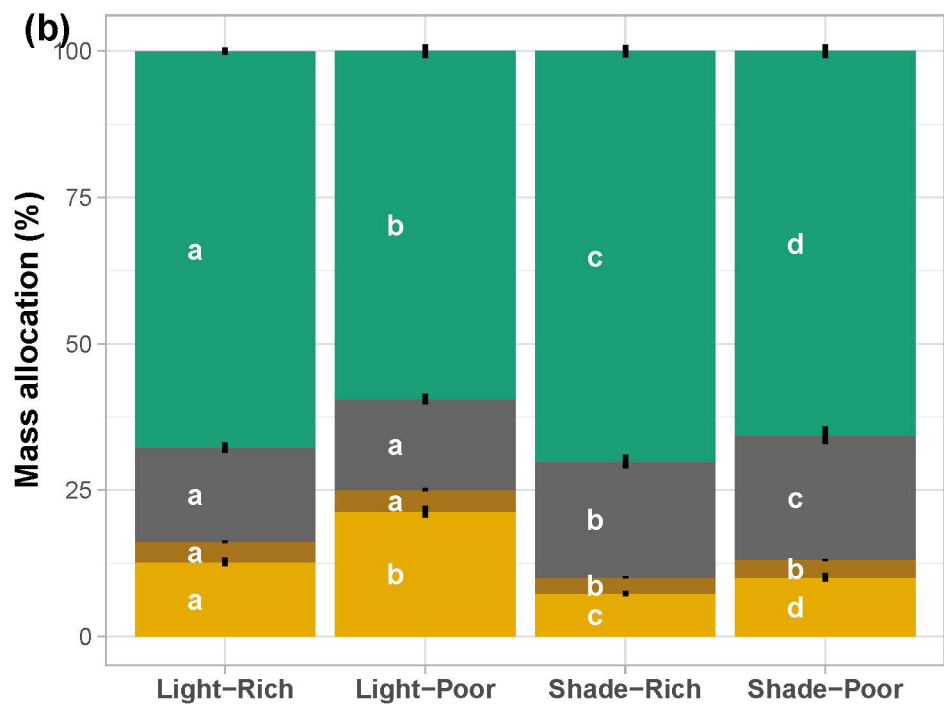

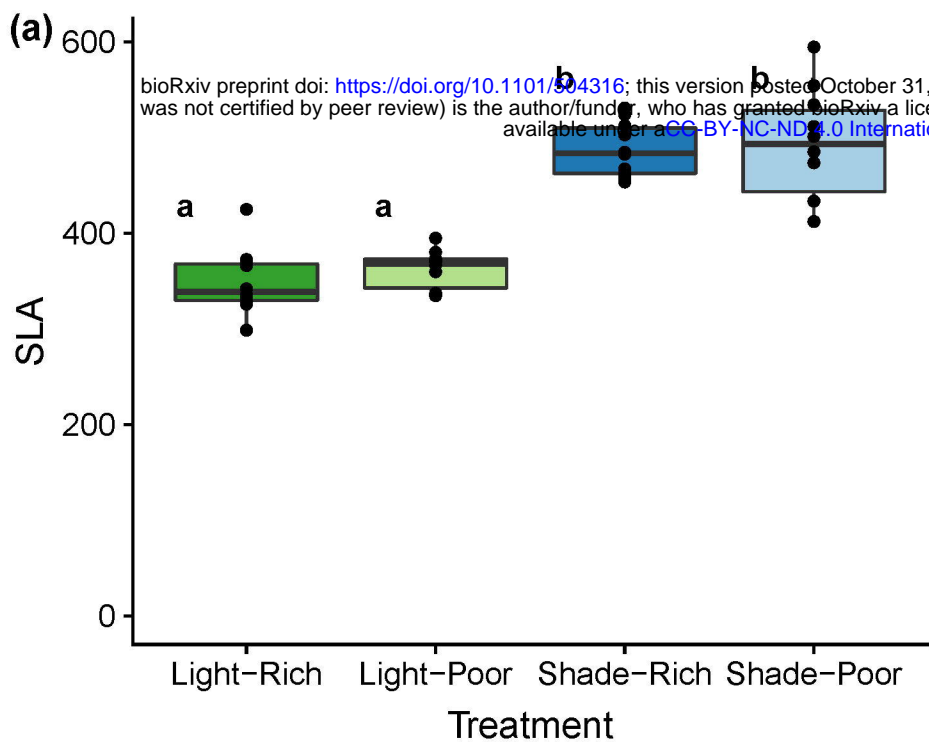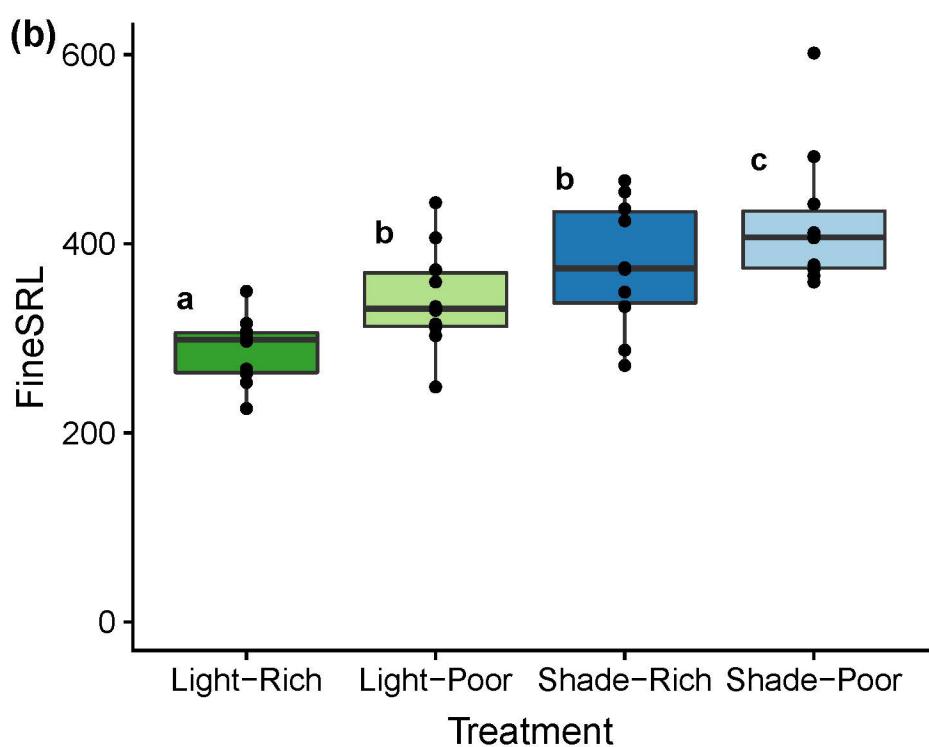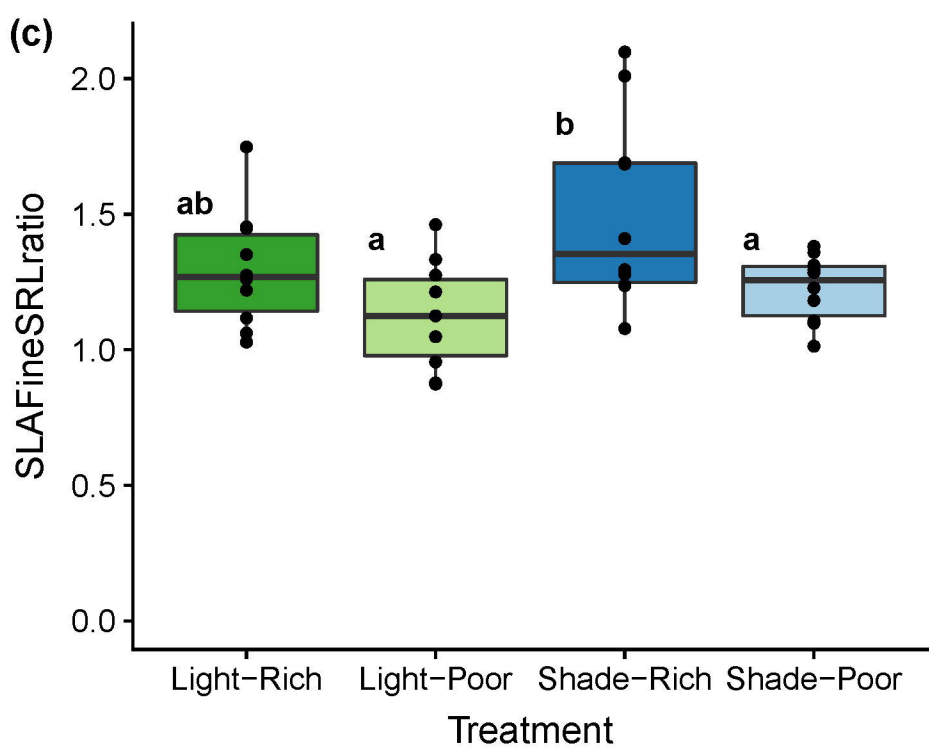

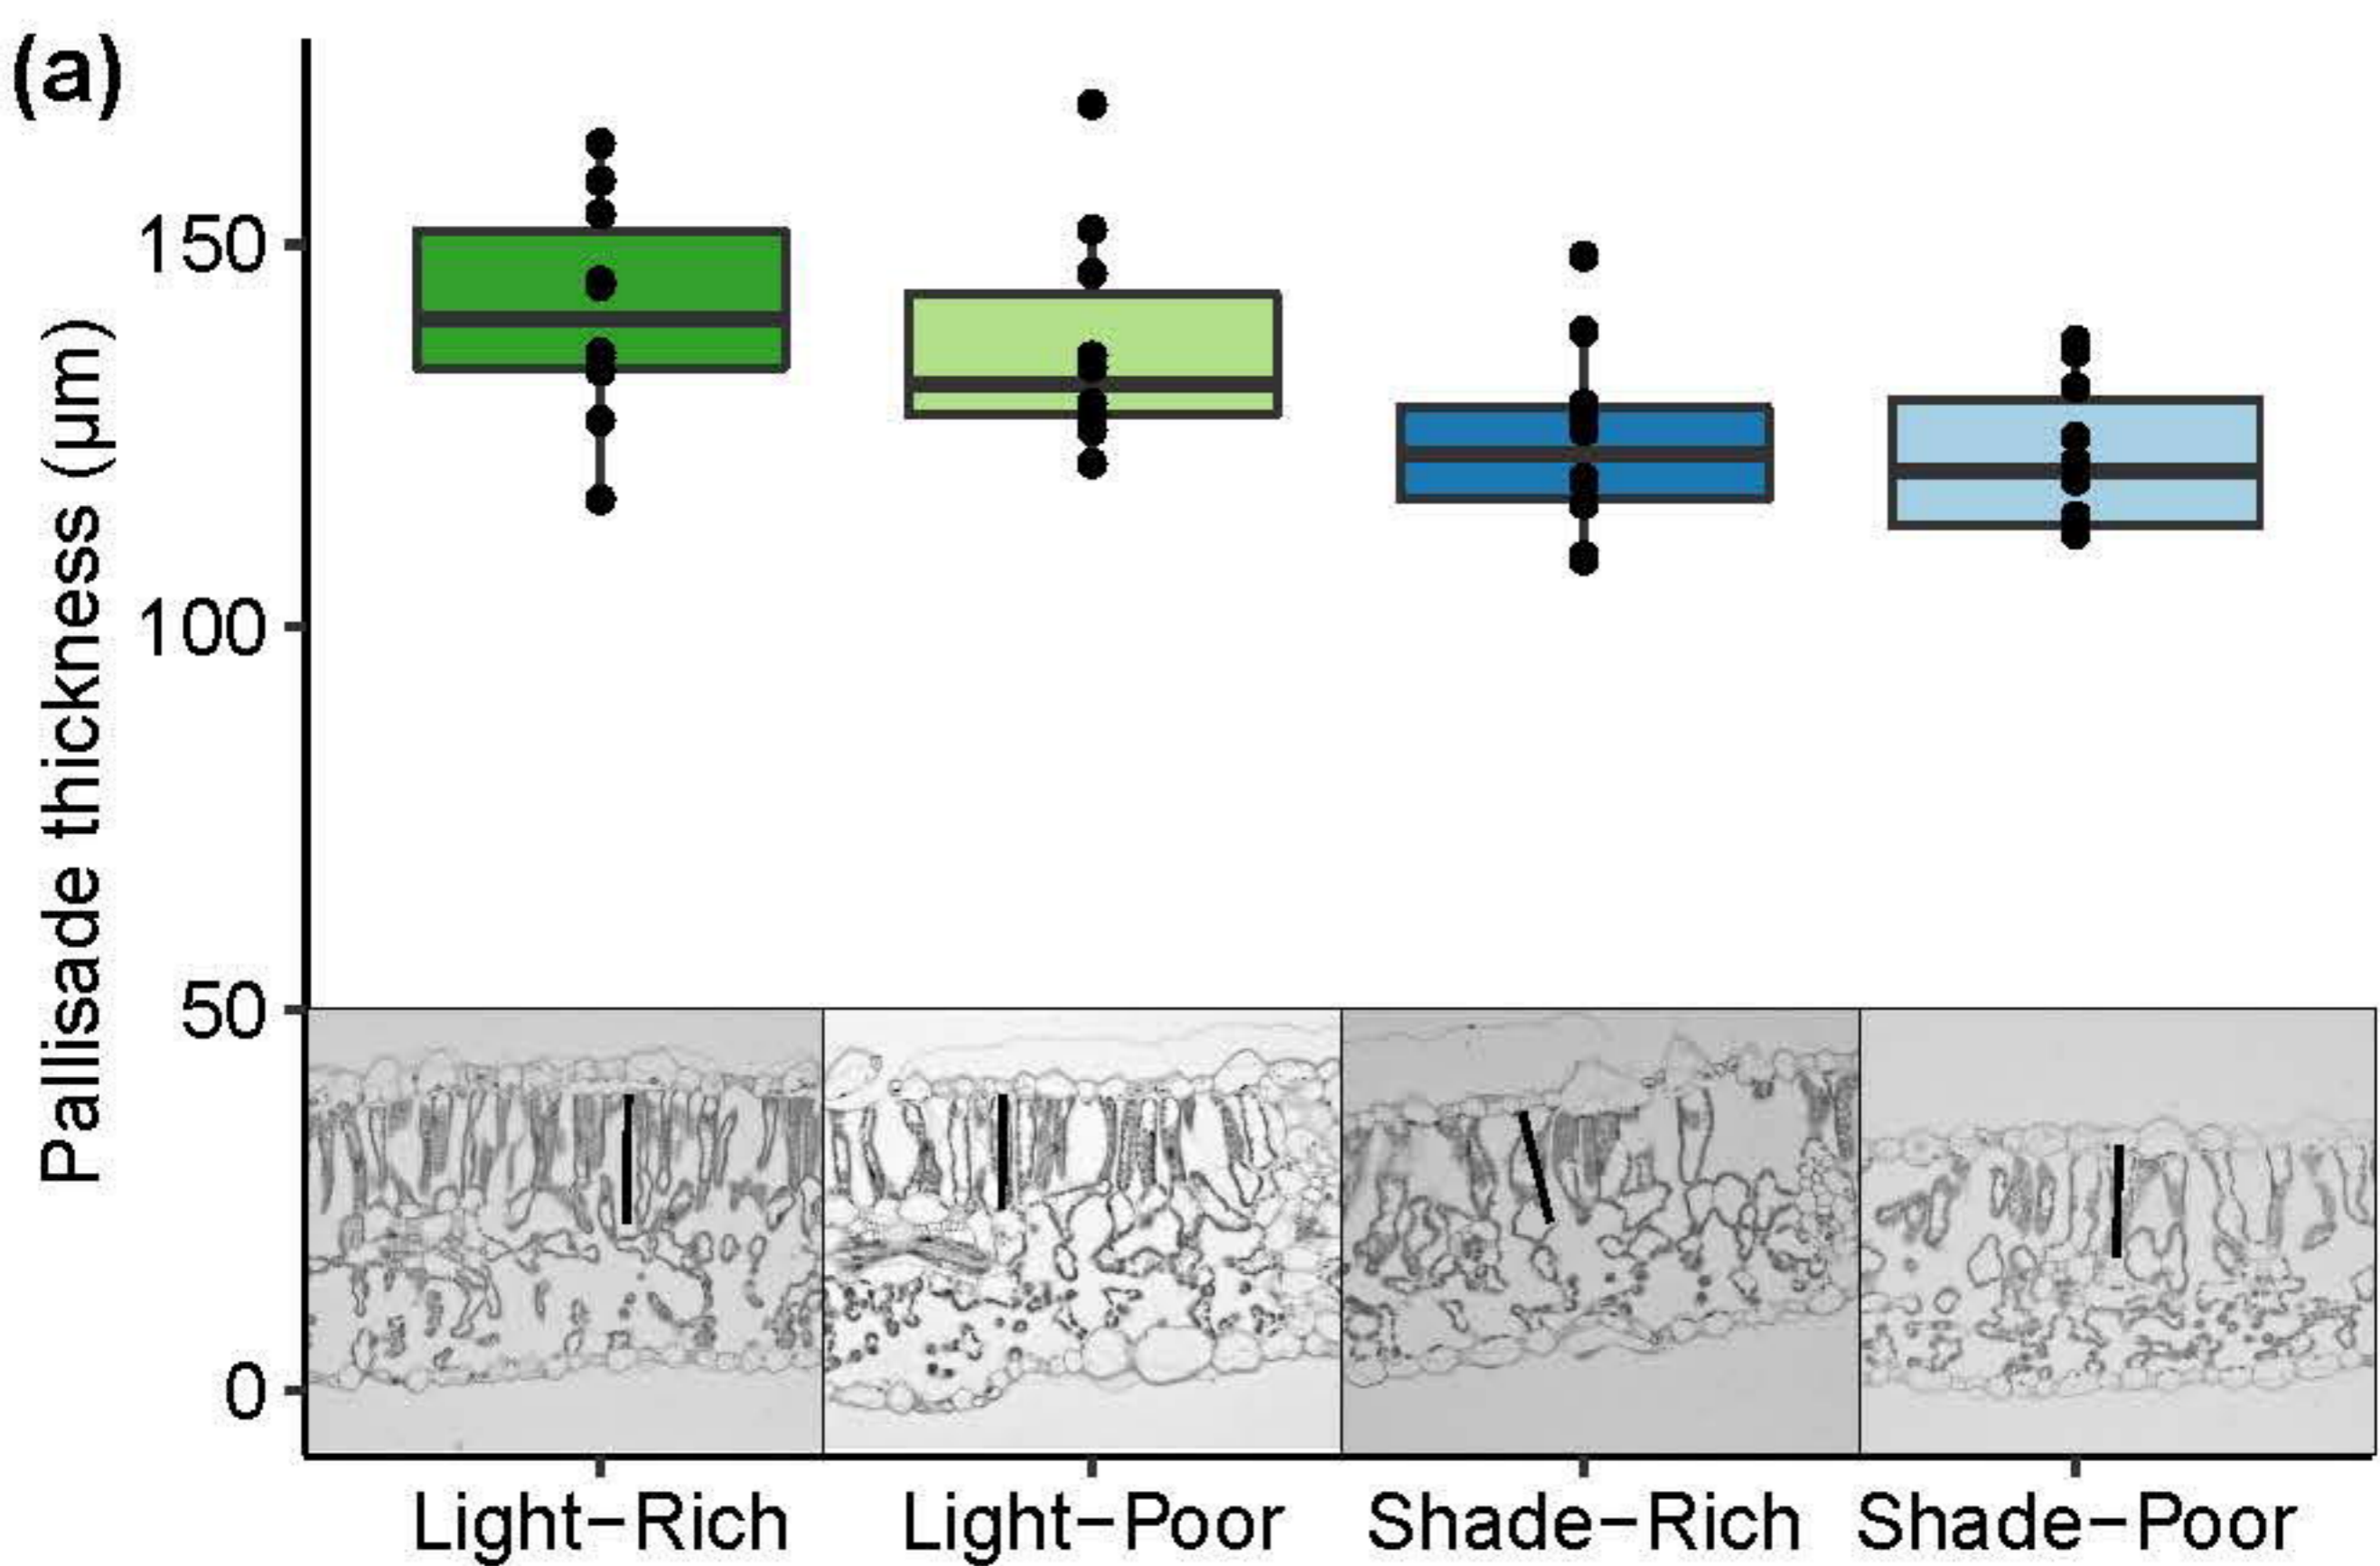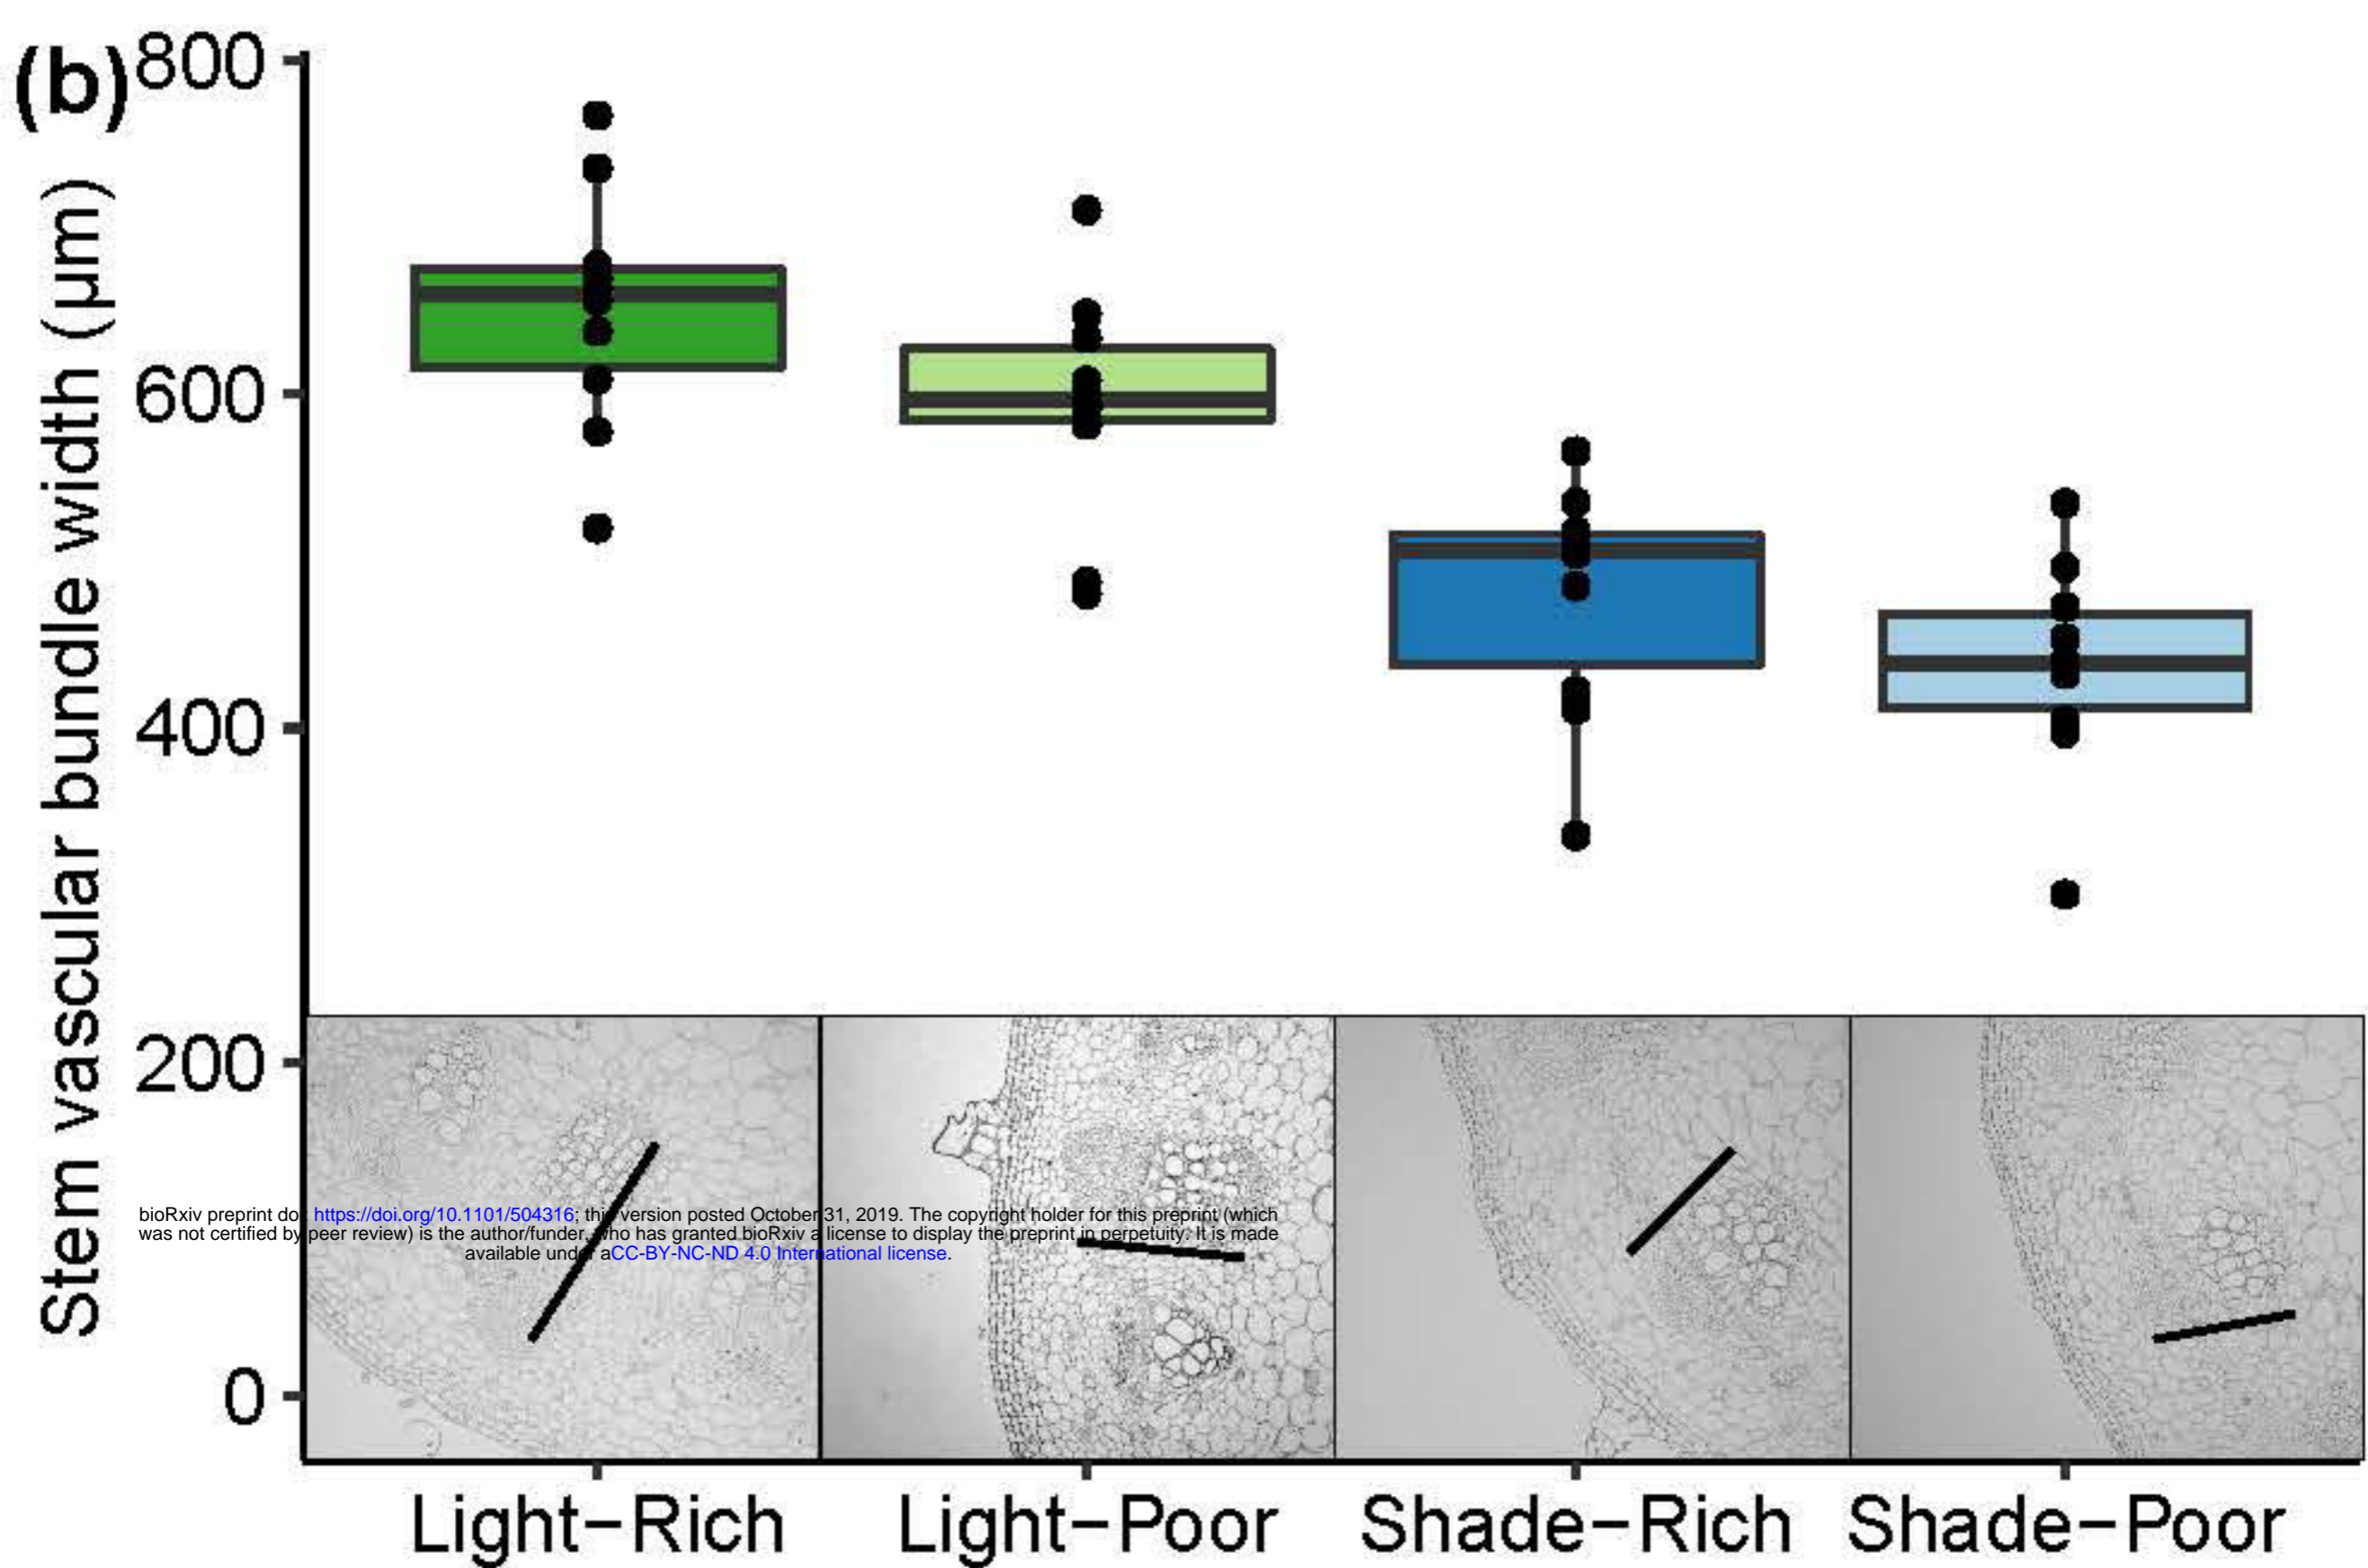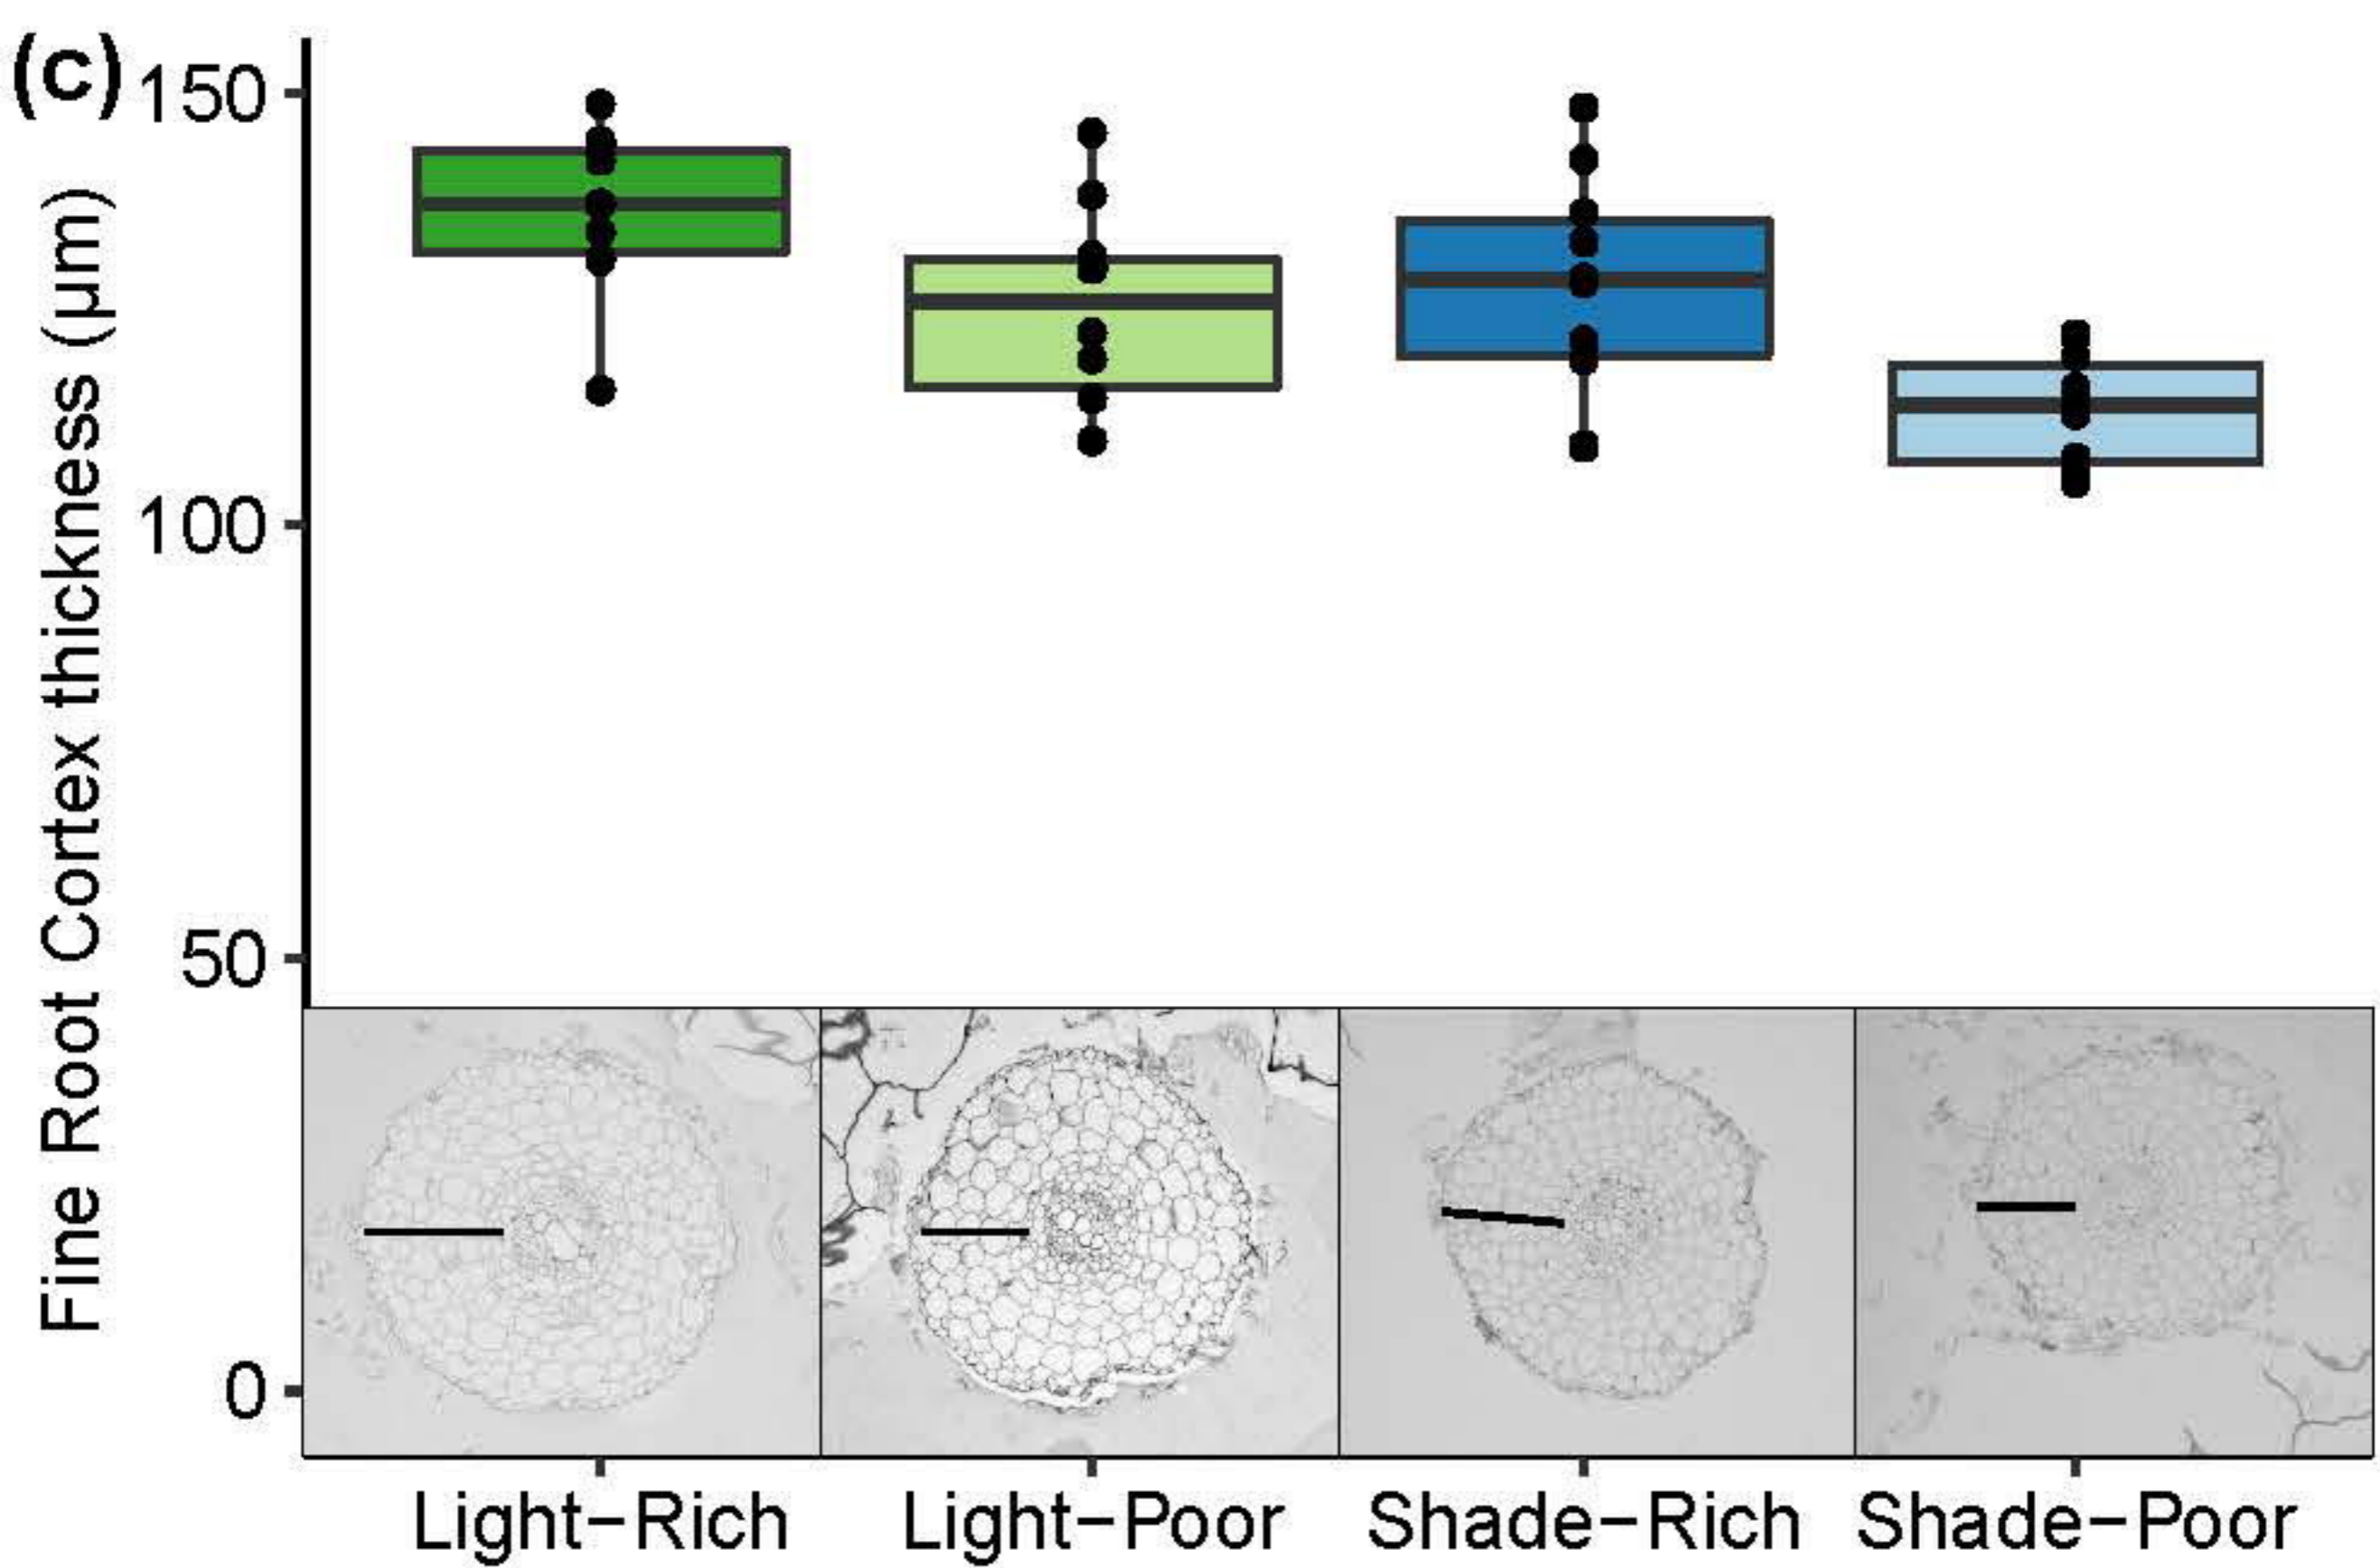

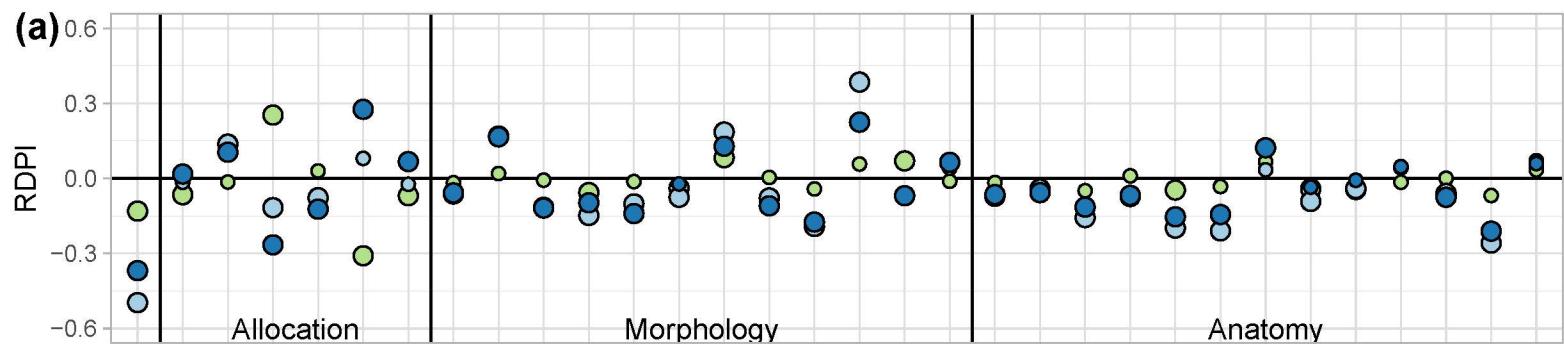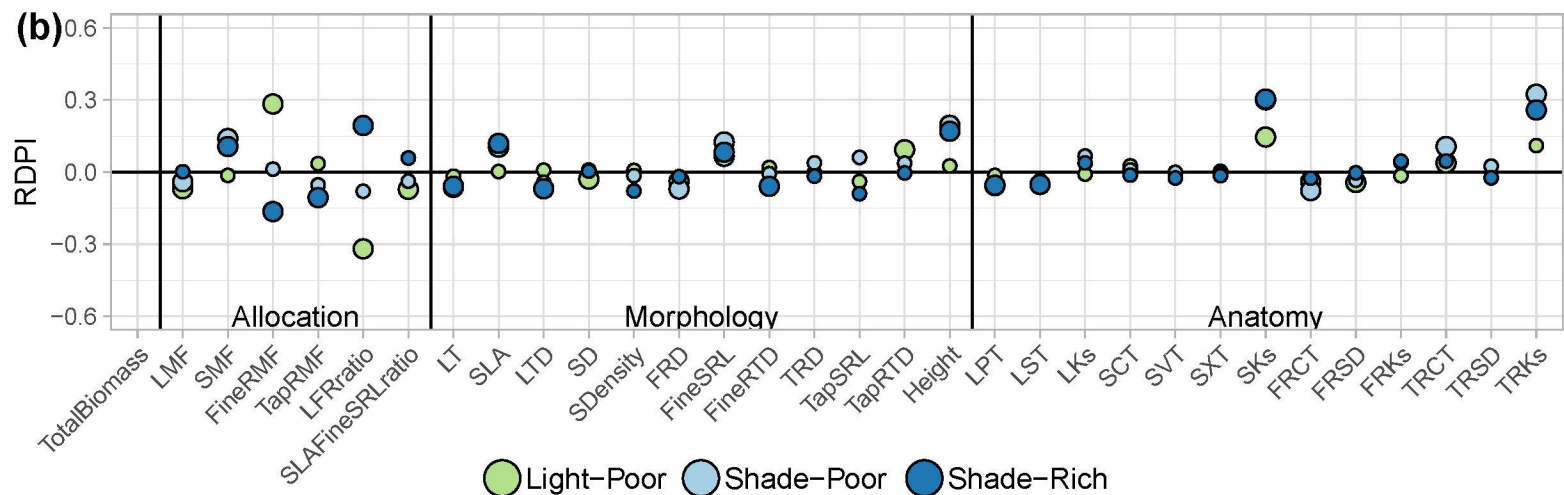

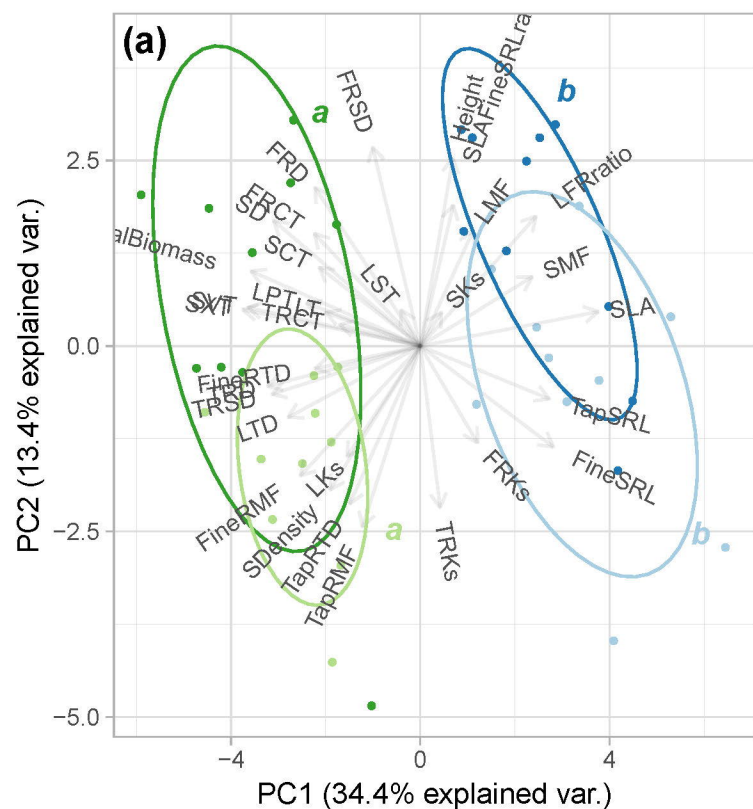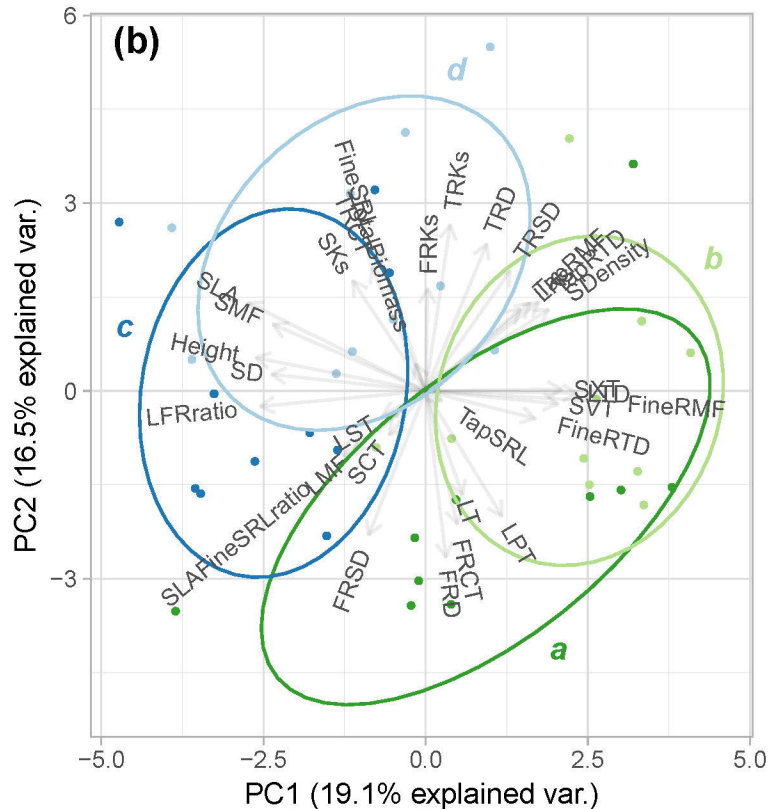

—●— Light-Rich —●— Light-Poor —●— Shade-Rich —●— Shade-Poor
